# 1 *De novo* learning and adaptation of 2 continuous control in a manual 3 tracking task

4 Christopher S Yang<sup>1\*</sup>, Noah J Cowan<sup>2</sup>, Adrian M Haith<sup>3</sup>

\*For correspondence:

[christopher.yang@jhmi.edu](mailto:christopher.yang@jhmi.edu) (CSY)

5 <sup>1</sup>Department of Neuroscience, Johns Hopkins University, Baltimore, USA; <sup>2</sup>Department of  
6 Mechanical Engineering, Johns Hopkins University, Baltimore, USA; <sup>3</sup>Department of  
7 Neurology, Johns Hopkins University, Baltimore, USA

---

8

9 **Abstract** How do people learn to perform tasks that require continuous adjustments of motor  
10 output, like riding a bicycle? People rely heavily on cognitive strategies when learning discrete  
11 movement tasks, but such time-consuming strategies are infeasible in continuous control tasks  
12 that demand rapid responses to ongoing sensory feedback. To understand how people can learn  
13 to perform such tasks without the benefit of cognitive strategies, we imposed a rotation/mirror  
14 reversal of visual feedback while participants performed a continuous tracking task. We analyzed  
15 behavior using a system identification approach which revealed two qualitatively different  
16 components of learning: adaptation of a baseline controller and formation of a new task-specific  
17 continuous controller. These components exhibited different signatures in the frequency domain  
18 and were differentially engaged under the rotation/mirror reversal. Our results demonstrate that  
19 people can rapidly build a new continuous controller *de novo* and can flexibly integrate this process  
20 with adaptation of an existing controller.

---

## 22 Introduction

23 In many real-world motor tasks, skilled performance requires us to continuously control our actions  
24 in response to ongoing external events. For example, remaining stable on a bicycle depends on  
25 being able to rapidly respond to the tilt of the bicycle as well as obstacles in our path. The demand  
26 for continuous control in such tasks can pose additional challenges when it comes to learning them  
27 in the first place. In particular, new skills often require us to learn arbitrary relationships between  
28 our actions and their outcomes (like moving our arms to steer or flexing our fingers to brake) and it  
29 is thought that learning such mappings depends on the use of time-consuming cognitive strategies  
30 (*McDougle et al., 2016*). Continuous control tasks, however, require us to produce responses rapidly,  
31 leaving little time for deliberation about our actions. Therefore, it remains unclear how continuous  
32 motor skills are learned.

33 Studies of motor learning have revealed a variety of different processes that support motor  
34 learning in humans (*Krakauer et al., 2019*). One of the most well-characterized processes is  
35 adaptation, an error-driven learning mechanism by which task performance is improved by using  
36 sensory prediction errors to recalibrate motor output (*Mazzoni and Krakauer, 2006; Tseng et al.,*  
37 *2007; Shadmehr et al., 2010*). Adaptation is primarily characterized by the presence of aftereffects  
38 (*Redding and Wallace, 1993; Shadmehr and Mussa-Ivaldi, 1994; Kluzik et al., 2008*) and is known  
39 to support learning in a variety of laboratory settings including making simple movements under  
40 imposed visuomotor rotations (*Krakauer et al., 1999; Fernández-Ruiz et al., 2011; Morehead et al.,*

41 2015), prism goggles (Martin et al., 1996; Fernández-Ruiz and Díaz, 1999), split-belt treadmills (Choi  
42 and Bastian, 2007; Finley et al., 2015), force fields (Lackner and Dizio, 1994; Shadmehr and Mussa-  
43 Ivaldi, 1994), as well as in more complex settings such as path integration in gain-altered virtual  
44 reality (Tcheang et al., 2011; Jayakumar et al., 2019). However, it appears that adaptation can only  
45 adjust motor output to a limited extent; in the case of visuomotor rotations, implicit adaptation is  
46 only capable of 15–25° of compensation, even when much larger rotations are applied (Taylor et al.,  
47 2010; Fernández-Ruiz et al., 2011; Taylor and Ivry, 2011; Bond and Taylor, 2015). This suggests  
48 that other mechanisms are required when learning to compensate for perturbations that impose  
49 significant deviations from one's existing baseline motor repertoire.

50 In scenarios where adaptation is insufficient, people appear to adopt a re-aiming strategy to  
51 compensate for perturbed visual feedback. This strategy involves aiming one's movements towards  
52 a surrogate target rather than the true target of the movement. It has been shown that people  
53 use re-aiming strategies—or more generally, cognitive strategies—to compensate (at least in part)  
54 for visuomotor rotations (Mazzoni and Krakauer, 2006; de Rugy et al., 2012; Taylor et al., 2014;  
55 Morehead et al., 2015) and force fields (Schween et al., 2019). In principle, re-aiming enables people  
56 to compensate for arbitrary re-mappings of their environment, including large (90°) visuomotor  
57 rotations (Bond and Taylor, 2015) or mirror-reversed visual feedback (Wilterson and Taylor, 2019).  
58 However, implementing re-aiming is cognitively demanding and time-consuming process that  
59 significantly increases reaction times (Haith et al., 2015; Leow et al., 2017; McDougale and Taylor,  
60 2019; Fernández-Ruiz et al., 2011). Indeed, although people can successfully compensate for a  
61 mirror reversal in point-to-point reaching tasks, this learning is not reflected in feedback response  
62 corrections to mid-movement perturbations (Telgen et al., 2014; Kasuga et al., 2015; Gritsenko and  
63 Kalaska, 2010), suggesting that the initial compensation was achieved through time-consuming  
64 re-aiming that could not be applied during a rapid online correction. By contrast, adaptation  
65 generalizes strongly to online corrective movements (Ahmadi-Pajouh et al., 2012; Cluff and Scott,  
66 2013; Telgen et al., 2014). Thus, re-aiming strategies seem unlikely to account for how humans  
67 learn motor tasks that require continuous responses to perturbations and changing goals.

68 Instead, continuous tasks must likely be learned by building a new controller that implements  
69 the newly required mapping from sensory input to motor output—a process that has been termed  
70 *de novo* learning (Figure 1A) (Costa, 2011; Telgen et al., 2014; Sternad, 2018). This approach can  
71 be contrasted with adaptation, which parametrically adjusts the existing controller, and with re-  
72 aiming, which maintains the existing controller and provides it with artificial movement goals  
73 to obtain the desired motor output. It has been suggested that *de novo* learning is necessary  
74 when learning to compensate for a mirror-reversal of visual feedback. Theoretical and empirical  
75 findings have demonstrated that the learning rules which allow people to adapt to visuomotor  
76 rotations fail under mirror reversal (Abdelghani et al., 2008; Hadjiosif et al., 2020). Other studies  
77 have shown that mirror-reversal learning, unlike rotation learning, does not result in reach-direction  
78 aftereffects (Gutierrez-Garralda et al., 2013; Lillicrap et al., 2013) and likely has a distinct neural  
79 basis from rotation learning (Schugens et al., 1998; Maschke et al., 2004; Morton and Bastian,  
80 2006; Gutierrez-Garralda et al., 2013). Although some studies have suggested the opposite, namely  
81 that mirror-reversals and rotations engage the same learning mechanisms (Werner and Bock,  
82 2010; Bock, 2013), existing evidence overwhelmingly supports the view that these perturbations  
83 engage—at least in part—qualitatively distinct mechanisms.

84 While most studies indicate that mirror reversal is learned *de novo*, many of them used experi-  
85 mental paradigms involving discrete movements (e.g., point-to-point reaches, ball throwing) that  
86 can be learned via re-aiming; for a point-to-point reach, if one knows the mirroring axis, one can  
87 still use their existing baseline controller to generate movement and simply aim their hand across  
88 the axis to reach the target. To dissociate true *de novo* learning of a new controller from re-aiming  
89 it is necessary to consider tasks in which movement goals change more quickly than the time it  
90 takes for slow cognitive strategies to be applied. One such approach is to require participants  
91 to continuously track an unpredictable stimulus. Although several studies have tested continu-

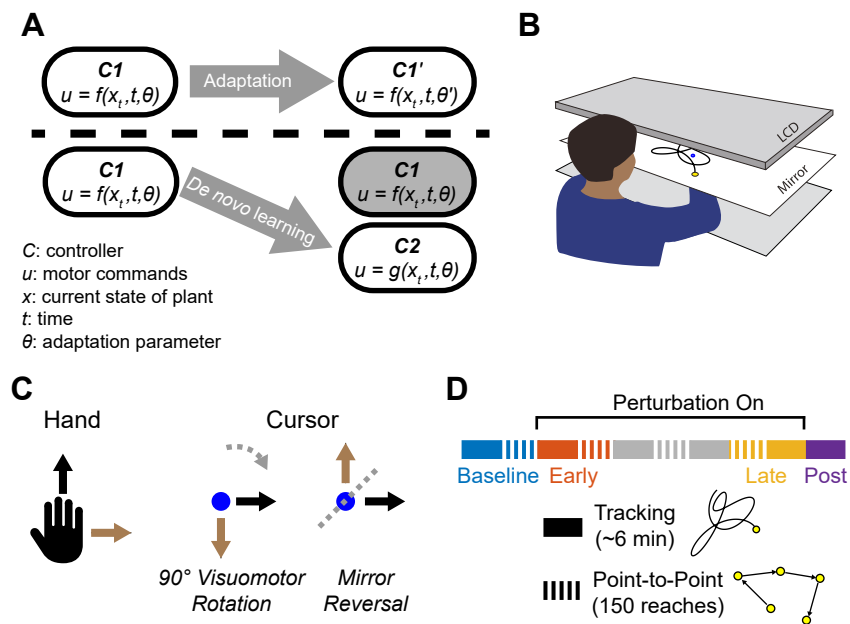

**Figure 1.** Conceptual overview and experimental design. **A.** We conceptualize adaptation as a parametric change to an existing controller (changing  $\theta$  to  $\theta'$ ) and *de novo* learning as building a new controller ( $g$ ) to replace the baseline controller ( $f$ ). **B.** Participants performed planar movements with their right hand while a target (yellow) and cursor (blue) were presented to them on an LCD display. Participants were asked to either move the cursor to a static target (point-to-point task) or track a moving target with the cursor (tracking task). **C.** Participants learned to control the cursor under one of two visuomotor perturbations: a 90° visuomotor rotation, or a mirror reversal. **D.** Participants alternated between point-to-point reaching (1 block = 150 reaches) and tracking (1 block = ~6 mins). We first measured baseline performance in both tasks under veridical visual feedback (blue), followed by interleaved tracking and point-to-point blocks with perturbed visual feedback from early learning (orange) to late learning (yellow). At the end of the experiment, we assessed aftereffects in the tracking task by removing the perturbation (purple).

ous tracking under mirror reversal (Schugens et al., 1998; Bock and Schneider, 2001; Bock et al., 2001), these studies used low-frequency stimuli (<0.35 Hz) which could potentially be tracked using intermittent "catch-up" movements that are strategically planned similar to explicit re-aiming of point-to-point movements (Craig, 1947; Miall et al., 1993a; Russell and Sternad, 2001). Therefore, to our knowledge, no study has yet demonstrated that mirror-reversal genuinely reflects *de novo* learning of a continuous controller.

Here, we sought to explicitly test whether a motor task could be learned by forming a *de novo* controller, rather than through adaptation or re-aiming. Participants learned to counter a mirror-reversal of visual feedback in both a point-to-point movement task and in a continuous tracking task in which a target moved in a pseudorandom sum-of-sinusoids trajectory (Figure 1B-C) (Miall et al., 1993b; Kiemel et al., 2006; Roth et al., 2011; Madhav et al., 2013; Sponberg et al., 2015; Yamagami et al., 2019). The target in the tracking task moved continuously and unpredictably at frequencies ranging from 0.1–2.15 Hz—a high enough frequency that participants could not engage in time-consuming deliberate planning of the kind associated with re-aiming (Fernández-Ruiz et al., 2011; McDougale and Taylor, 2019; Leow et al., 2017; Haith et al., 2015). Participants instead had to continuously generate movements to track the target. Critically, the sum-of-sines structure of the target motion allowed us to employ a frequency-based system identification approach to characterize changes in participants' motor controllers during mirror-reversal learning. We compared learning in this group to that of a second group of participants that learned to counter a visuomotor rotation, where presumably—unlike mirror reversal—adaptation would contribute to learning.

We hypothesized that participants learning to counter the mirror reversal would be able to learn a *de novo* controller that enables them to smoothly track the target. If, however, the mirror reversal can only be learned through a re-aiming strategy, participants would be incapable of performing

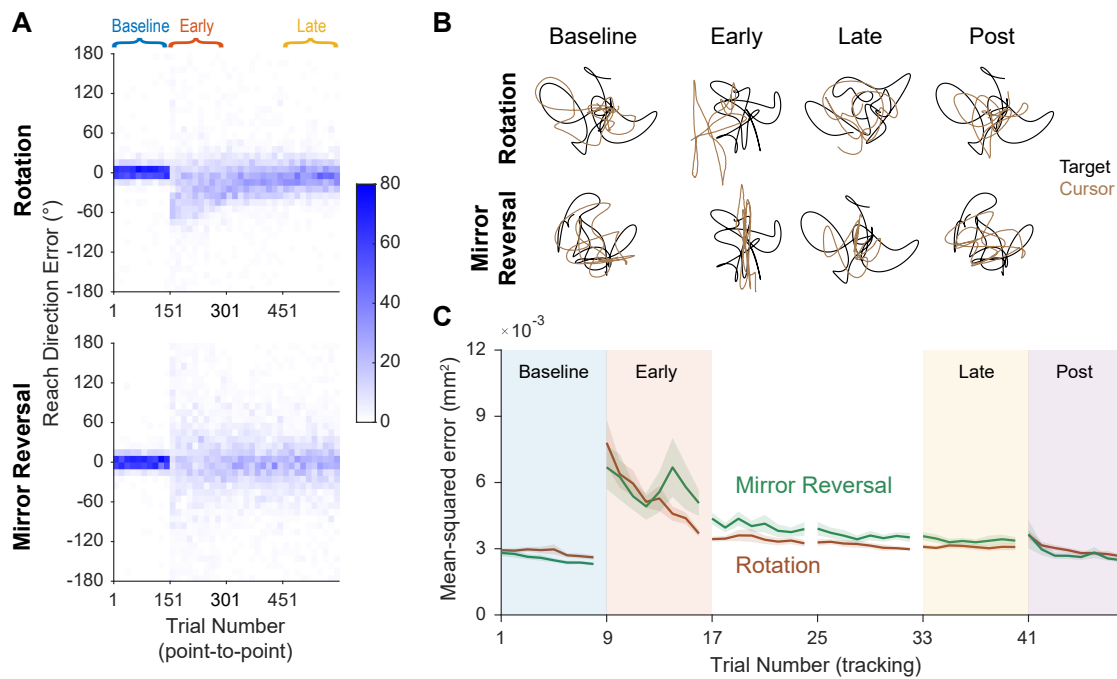

**Figure 2.** Task performance improves in the point-to-point and tracking tasks. **A.** Performance in the point-to-point task, as quantified by initial reach direction error, is plotted as heat maps for the rotation (top) and mirror-reversal groups (bottom). Each column shows the distribution of initial reach direction errors, pooled across all participants, over a (horizontal) bin of 15 trials. The intensity of color represents the number of trials in each 10° vertical bin (max possible value of 150 for any bin). **B.** Example tracking trajectories from a representative participant in each group. Target trajectories are shown in black while cursor trajectories are shown in brown. Each trajectory displays approximately 5 seconds of movement. **C.** Performance in the tracking task as quantified by average mean-squared positional error between the cursor and target during each trial. Error bars are SEM across participants.

**Figure 2–video 1.** Video of tracking behavior at different time points during learning.

116 the continuous feedback control required to track the target. Additionally, we hypothesized that  
 117 participants *should* be able to counter the rotation in the tracking task due to the presence of  
 118 sensory prediction errors—the only error signal needed to drive adaptation.

## 119 Results

### 120 Participants Learned to Compensate for the Rotation and Mirror Reversal but us- 121 ing Different Learning Mechanisms

122 Twenty participants used their right hand to manipulate an on-screen cursor under either a 90°  
 123 visuomotor rotation ( $n = 10$ ) or a mirror reversal ( $n = 10$ ) about an oblique 45° axis (**Figure 1C**).  
 124 These perturbations were designed such that, in both cases, motion of the hand in the  $x$  direction  
 125 was mapped to cursor motion in the  $y$  direction and vice versa. Each group first practiced moving  
 126 under their respective perturbation in a *point-to-point* task, reaching towards targets that appeared  
 127 at random locations on the screen (**Figure 1D**), and we quantified their performance in each trial  
 128 through the error in their initial reach direction. For the rotation group, this error decreased  
 129 as a function of training time and plateaued near 0°, demonstrating that participants successfully  
 130 learned to compensate for the rotation (**Figure 2A**, upper panel). For the mirror-reversal group, the  
 131 directional error did not show any clear learning (**Figure 2A**, lower panel), but performance was  
 132 better than would be expected if participants had not attempted to compensate at all (which would  
 133 manifest as reach errors uniformly distributed between  $\pm 180^\circ$ ). Thus, both groups of participants  
 134 compensated for the perturbations during point-to-point movements (at least partially), consistent  
 135 with previous findings.

136 To test whether participants could compensate for these perturbations in a continuous control

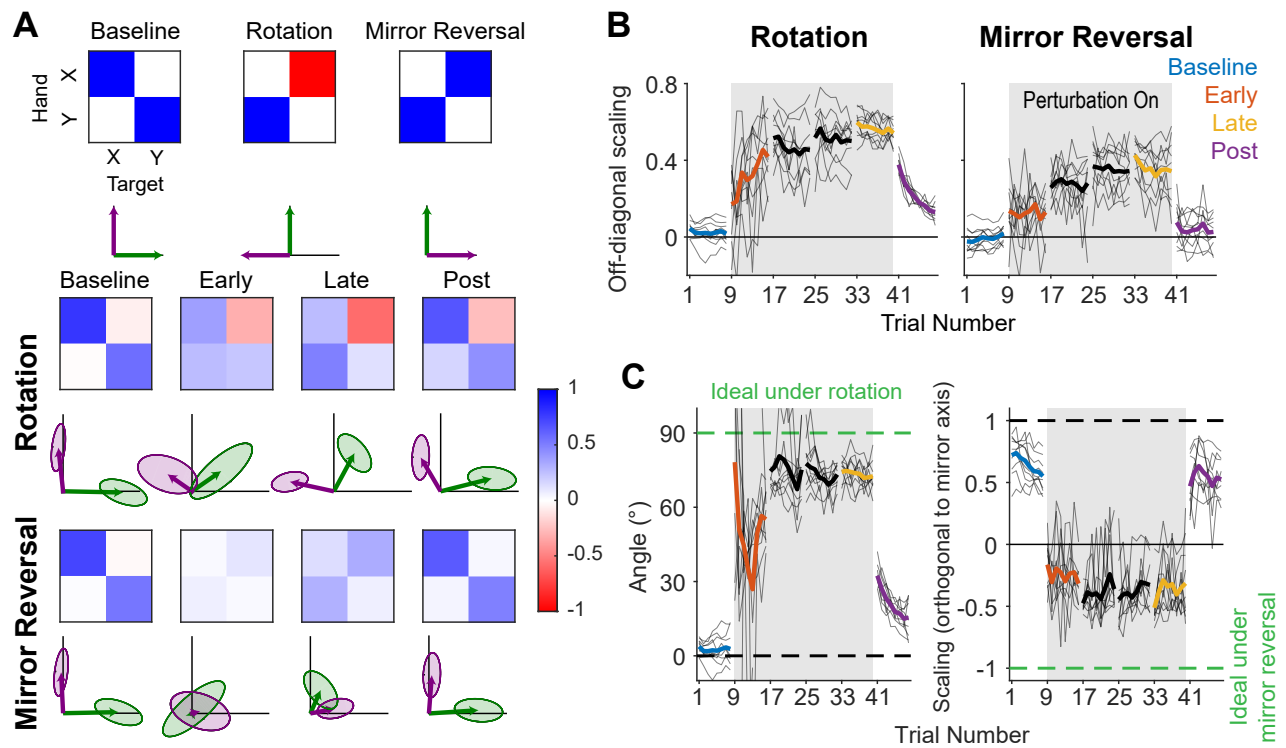

**Figure 3.** The rotation group exhibited reach-direction aftereffects while the mirror-reversal group did not. **A.** Alignment matrices relating target and hand movement established by trajectory alignment. The top row illustrates the ideal alignment matrices at baseline or to successfully compensate for each perturbation (blue represents positive values, red represents negative values). Alignment matrices (calculated from one trial averaged across participants) from the rotation (middle row) and mirror-reversal (bottom row) groups are depicted at different points during learning. Below each matrix, we visualized how the unit  $x$  and  $y$  vectors (black lines) would be transformed by the columns of the matrices (transformed  $x$  = green, transformed  $y$  = purple). Shaded areas are 95% confidence ellipses across participants. **B.** The average of the two off-diagonal elements of the estimated alignment matrices across all blocks of the experiment (baseline through post). Grey boxes indicate when the rotation or mirror reversal were applied. Thin black lines indicate individual participants and thick lines indicate the mean across participants. **C.** (Left: rotation group) Angular compensation for the rotation, estimated by approximating each alignment matrix with a pure rotation matrix. (Right: mirror-reversal group) Scaling factor orthogonal to the mirror axis. In each plot, dashed lines depict ideal performance when the perturbation is (green) or is not (black) applied. Thin black lines indicate individual participants and thick lines indicate the mean across participants.

137 task after having practiced them in the point-to-point task, we had them perform a manual tracking  
 138 task. In this task, participants tracked a target that moved in a continuous sum-of-sinusoids  
 139 trajectory at frequencies ranging between 0.1–2.15 Hz, with distinct frequencies used for  $x$ - and  
 140  $y$ -axis target movement. The resulting target motion was unpredictable and appeared random.  
 141 Furthermore, the target’s trajectory was altered every block by randomizing the phases of the  
 142 component sinusoids, preventing participants from being able to learn a specific target trajectory.  
 143 Example trajectories from single participants are presented in **Figure 2B** (see also **Figure 2-video 1**  
 144 for a movie of tracking behavior).

145 As an initial assessment of how well participants learned to track the target, we measured the  
 146 average mean-squared positional error (tracking error) between the target and cursor trajectories  
 147 during every tracking trial. Tracking error improved with practice in both groups of participants,  
 148 approaching similar levels of error by late learning (**Figure 2C**). Therefore, in both the point-to-point  
 149 and tracking tasks, participants’ performance improved with practice. However, this measure  
 150 of tracking error is insensitive to changes in the direction of cursor movement, a feature of the  
 151 behavior that is critical for distinguishing how participants learned to counter the rotation versus  
 152 the mirror reversal.

153 Instead, we quantified participants’ behavior in the tracking task using a different method,

154 estimating how participants translated target motion into hand motion at different points during  
155 learning. We aligned the hand and target tracking trajectories with a linear transformation matrix  
156 (alignment matrix) that, when applied to the target trajectory, minimized the discrepancy between  
157 the hand and target trajectories (see Methods for details). This approach was sensitive to detecting  
158 the directionality of hand movements, allowing us to more precisely quantify how participants  
159 altered their movements during learning.

160 **Figure 3A** shows the estimated matrices for both groups at different time points during the  
161 experiment, along with a visualization of how they affected the unit  $x$  and  $y$  vectors. At baseline, the  
162 estimated alignment matrices were close to the identity matrix, as would be expected if the hand  
163 trajectory is well aligned with the target trajectory. Under perturbed feedback, perfect tracking  
164 would be achieved when the alignment matrix is equal to the inverse of the matrix representing  
165 the applied perturbation. Indeed, by late learning, the alignment matrices resembled this inverse  
166 under both perturbations.

167 To test whether these changes were statistically significant, we focused on the off-diagonal  
168 elements of the matrices. These elements critically distinguish the different transformations from  
169 one another and from baseline. In late learning, both the rotation (linear mixed effects model [see  
170 "Statistics" in Methods for details about the structure of the model]: two-way interaction between  
171 group and block ( $F(2, 36) = 7.56, p = 0.0018$ ; Tukey's range test:  $p < 0.0001$ ) and mirror-reversal  
172 groups (Tukey's range test:  $p < 0.0001$ ) exhibited off-diagonal values that were significantly different  
173 from their baseline values (**Figure 3B**), and in the appropriate direction to compensate for their  
174 respective perturbations.

175 From these matrices, we derived additional metrics associated with each perturbation to further  
176 characterize learning. For the rotation group, we estimated a compensation angle,  $\theta$ , using a  
177 singular value decomposition approach (**Figure 3C**; see "Trajectory-alignment analysis" in Methods  
178 for details). At baseline, we found that  $\theta = 3.8 \pm 1.0^\circ$  (mean  $\pm$  SEM), and this increased to  $\theta = 72.5 \pm 1.9^\circ$   
179 by late learning. For the mirror-reversal group, to assess whether participants learned to flip the  
180 direction of their movements across the mirroring axis, we computed the scaling of the target  
181 trajectory along the direction orthogonal to the mirror axis (**Figure 3C**). This value was positive at  
182 baseline and negative by late learning, indicating that participants successfully inverted their hand  
183 trajectories relative to that of the target.

184 Lastly, we sought to confirm that the rotation and mirror reversal were learned using different  
185 mechanisms, as has been suggested by previous studies (*Gutierrez-Garralda et al., 2013*; *Telgen*  
186 *et al., 2014*). We did so by assessing whether participants in each group expressed reach-direction  
187 aftereffects—the canonical hallmark of adaptation—at the end of the experiment, following removal  
188 of each perturbation in the tracking task (and with participants made explicitly aware of this). Again  
189 estimating alignment matrices, we found that the magnitude of the aftereffects was different for  
190 the two visuomotor perturbations (**Figure 3B**). The off-diagonal elements for the rotation group  
191 were significantly different from baseline (Tukey's range test:  $p < 0.0001$ ), indicating clear aftereffects.  
192 These aftereffects corresponded to a compensation angle of  $\theta = 32.4 \pm 1.4^\circ$ , similar to the magnitude  
193 of aftereffects reported for visuomotor rotation in point-to-point tasks (*Bond and Taylor, 2015*;  
194 *Morehead et al., 2017*). For the mirror-reversal group, by contrast, the off-diagonal elements of  
195 the post-learning alignment matrix were not significantly different from baseline (Tukey's range  
196 test:  $p = 0.2057$ ; baseline range:  $-0.11$ – $0.11$ ; post-learning range:  $-0.07$ – $0.28$ ), suggesting negligible  
197 aftereffects. (Note that aftereffects were not evident in the mean-squared error analysis in **Figure**  
198 **2C**, as that analysis was not designed to be sensitive to the small changes in movement direction  
199 associated with aftereffects.) The lack of aftereffects under mirror-reversal implies that participants  
200 did not counter this perturbation via adaptation and instead engaged *de novo* learning.

201 In summary, these data suggest that participants were able to compensate for both perturba-  
202 tions in the more challenging tracking task. Consistent with previous studies, the data support the  
203 idea that the rotation was learned via adaptation while the mirror reversal was learned via *de novo*  
204 learning.

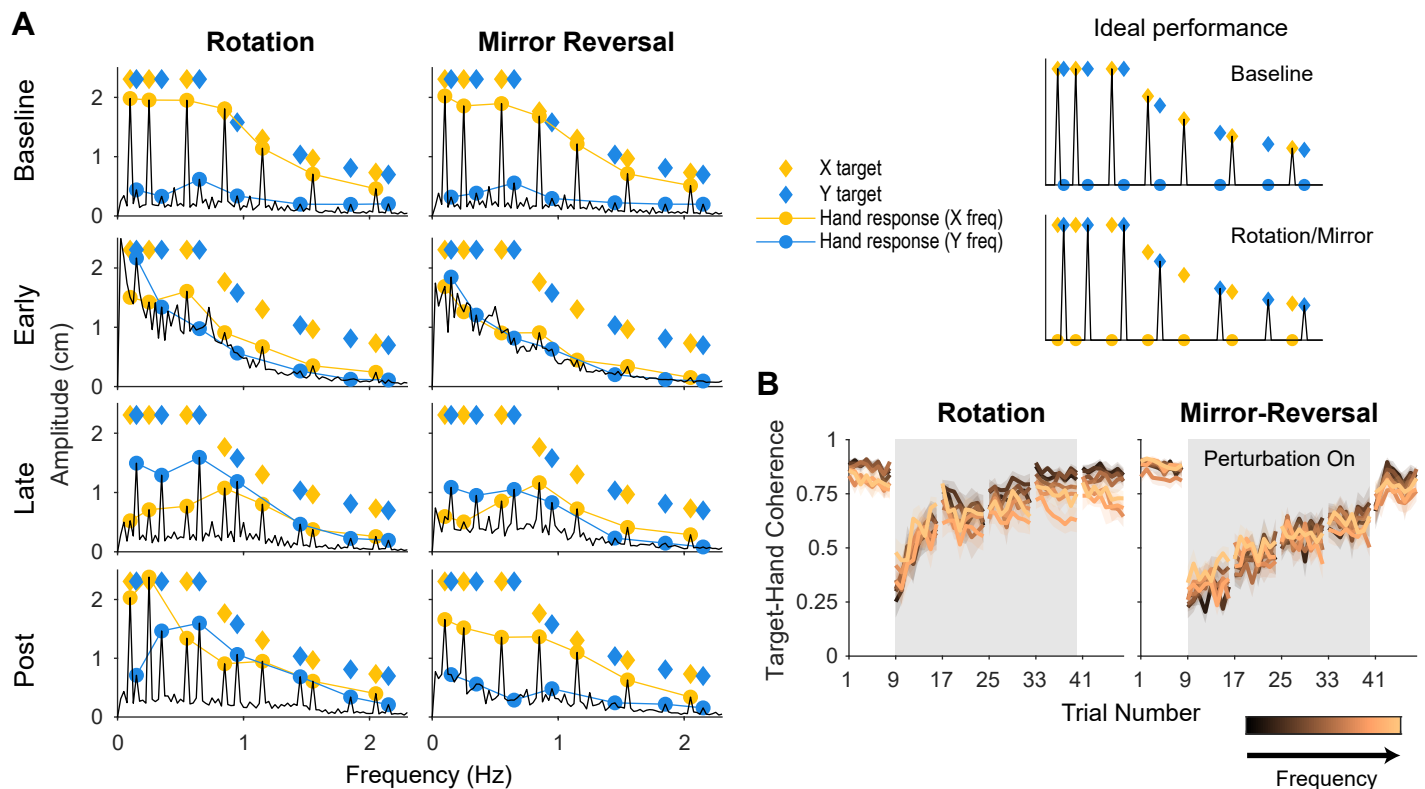

**Figure 4.** Tracking behavior was approximately linear, indicating that the hand tracked the target continuously. **A.** Amplitude spectra of *x*-hand trajectories (black line) averaged across participants from one trial in each listed block. In each plot, the amplitudes and frequencies of target motion are indicated by diamonds (yellow: *x*-target frequencies; blue: *y*-target frequencies). Hand responses at *x*- and *y*-target frequencies are highlighted as yellow and blue circles, respectively, and are connected by lines for ease of visualization. Ideal performance at baseline and under the rotation/mirror reversal are depicted on the right. **B.** Spectral coherence between *x*-target movement and both *x*- and *y*-hand movement (i.e., single-input multi-output coherence), which provides a measure of how linear the relationship is between target motion and hand motion. This coherence is proportional to the linear component of the hand's response to the target. Darker colors represent lower frequencies and lighter colors represent higher frequencies. Error bars are SEM across participants.

**Figure 4-Figure supplement 1.** Amplitude spectra and coherence plots for *y*-hand movements.

**Figure 4-Figure supplement 2.** Amplitude spectra of *x*-hand movements from single subjects.

## 205 Participants Performed Continuous Control to Track the Target

206 Although participants could learn to successfully perform the tracking task under both perturbations,  
 207 it is not necessarily clear that they achieved this using continuous control; the target moved primarily  
 208 at low frequencies (0.1–0.65 Hz) which by design had larger amplitude and lower velocity. This could  
 209 potentially have allowed participants to track the target through intermittent “catch-up” movements  
 210 that were strategically planned similar to explicit re-aiming of point-to-point movements (*Craik,*  
 211 *1947; Miall et al., 1993a; Russell and Sternad, 2001*). While it is difficult to rule this out based on  
 212 the trajectory alignment analysis, the tracking task was designed to be amenable to a more more  
 213 fine-grained analysis of participants' behavior using frequency-domain system identification that  
 214 would allow us to examine the continuity of movements.

215 We examined the amplitude spectra of participants' hand movements after transforming the  
 216 time-domain data to the frequency domain using the discrete Fourier transform and compared  
 217 these amplitude spectra to that of the target (*Figure 4A*). This allowed us to check whether the  
 218 dynamics of participants' tracking behavior was close to linear. If the relationship between hand  
 219 and target movement was linear this would imply that the hand moved at the same frequencies as  
 220 the target and, consequently, would suggest that participants were faithfully tracking the target  
 221 using continuous movements. In contrast, if the relationship was nonlinear (e.g., the hand moved at

222 different frequencies than the target), this would suggest that participants were using an alternative  
223 tracking strategy. Note that coupling across axes (e.g.,  $x$ -hand movements in both the  $x$  and  $y$ -axes  
224 at a given frequency) would *not* indicate nonlinear behavior; at a given frequency, the participant's  
225 goal during learning is to remap responses in one axis to the other. Thus, coupling would indicate  
226 an imperfect, though possibly linear, sensorimotor mapping.

227 At baseline, both groups of participants moved almost exclusively at the frequencies of the target  
228 (**Figure 4A**:  $x$ -hand data, **Figure 4-Figure Supplement 1**:  $y$ -hand data, **Figure 4-Figure Supplement 2**:  
229 single-subject data). More specifically,  $x$ -hand movements primarily occurred at  $x$ -target frequencies  
230 and  $y$ -hand movements primarily occurred at  $y$ -target frequencies, as would be expected for tracking  
231 behavior at baseline. The introduction of the perturbation led to a broadband increase in amplitude  
232 across all frequencies for both groups (**Figure 4A**, "Early"), indicating some nonlinear behavior as  
233 one might expect, particularly during early learning. However, the peaks at the target frequencies  
234 were still clearly identifiable. These nonlinearities abated with practice (**Figure 4A**, "Late") and  
235 remained modest after the perturbation was removed (**Figure 4A**, "Post").

236 We further quantified how linear participants' responses were by computing the spectral coher-  
237 ence between target and hand movement (Roddey et al., 2000). Although the coherence was low  
238 during early learning, it was close to the maximum value of 1 at baseline, late learning, and post-  
239 learning (**Figure 4B**:  $x$ -hand data, **Figure 4-Figure Supplement 1**:  $y$ -hand data). Altogether, these  
240 data are consistent with a linear relationship between target motion and hand motion, suggesting  
241 that both the rotation and mirror-reversal groups' tracking movements were continuous and that  
242 participants did not use an intermittent strategy to perform the task.

### 243 **Adaptation and De Novo Learning Exhibit Distinct Signatures in the Frequency Do-** 244 **main**

245 Because tracking behavior was approximately linear, this provided validation for using linear  
246 systems analysis to more deeply explore how learning altered participants' control capabilities.  
247 While learning likely results in nonlinear changes to motor controllers, the movements we observed  
248 (i.e., the product of learning) were linear. This allowed us to treat each trial as a snapshot of  
249 participants' input-output relationship between target and hand movement. While recent studies  
250 have shown that learning can occur on very fast timescales (Crevecoeur et al., 2020a,b), we believe  
251 the magnitude of these learning effects are small enough that each 40 second trial approximately  
252 captures a single state of the input-output relationship. Furthermore, such within-trial learning  
253 effects would likely be restricted only to the earliest blocks of exposure to the perturbation.

254 To perfectly compensate for either the rotation or the mirror reversal, movement at  $x$ -target  
255 frequencies needed to be remapped from  $x$ -hand movements to  $y$ -hand movements, and vice  
256 versa at  $y$ -target frequencies. During early learning, participants in the rotation group did produce  
257  $x$ -hand movements in response to  $y$ -target frequencies, but also inappropriately continued to  
258 produce  $x$ -hand movements at  $x$ -target frequencies (**Figure 4A**). By late learning, the amplitude of  
259  $x$ -hand movement further increased at  $y$ -target frequencies and decreased at  $x$ -target frequencies.  
260 Behavior for the mirror-reversal group followed a similar pattern, albeit with less pronounced peaks  
261 in the amplitude spectrum during early learning.

262 After the perturbation was removed (Post-learning), the rotation group exhibited  $x$ -hand move-  
263 ments at both  $x$ - and  $y$ -target frequencies, unlike baseline where movements were largely restricted  
264 to  $x$ -target frequencies (**Figure 4A**), indicating aftereffects, consistent with our earlier, trajectory-  
265 alignment analysis. In contrast, the amplitude spectrum of the mirror-reversal group's  $x$ -hand  
266 movements was similar to baseline, confirming that any aftereffects were negligible. These features  
267 of the amplitude spectra, and the differences across groups, were qualitatively the same for  $y$ -hand  
268 movements (**Figure 4-Figure Supplement 1**) and were also evident in individual subjects (**Figure**  
269 **4-Figure Supplement 2**).

270 Although the amplitude spectra illustrate important features of learning, they do not carry  
271 information about the directionality of movements and thus do not distinguish learning of the



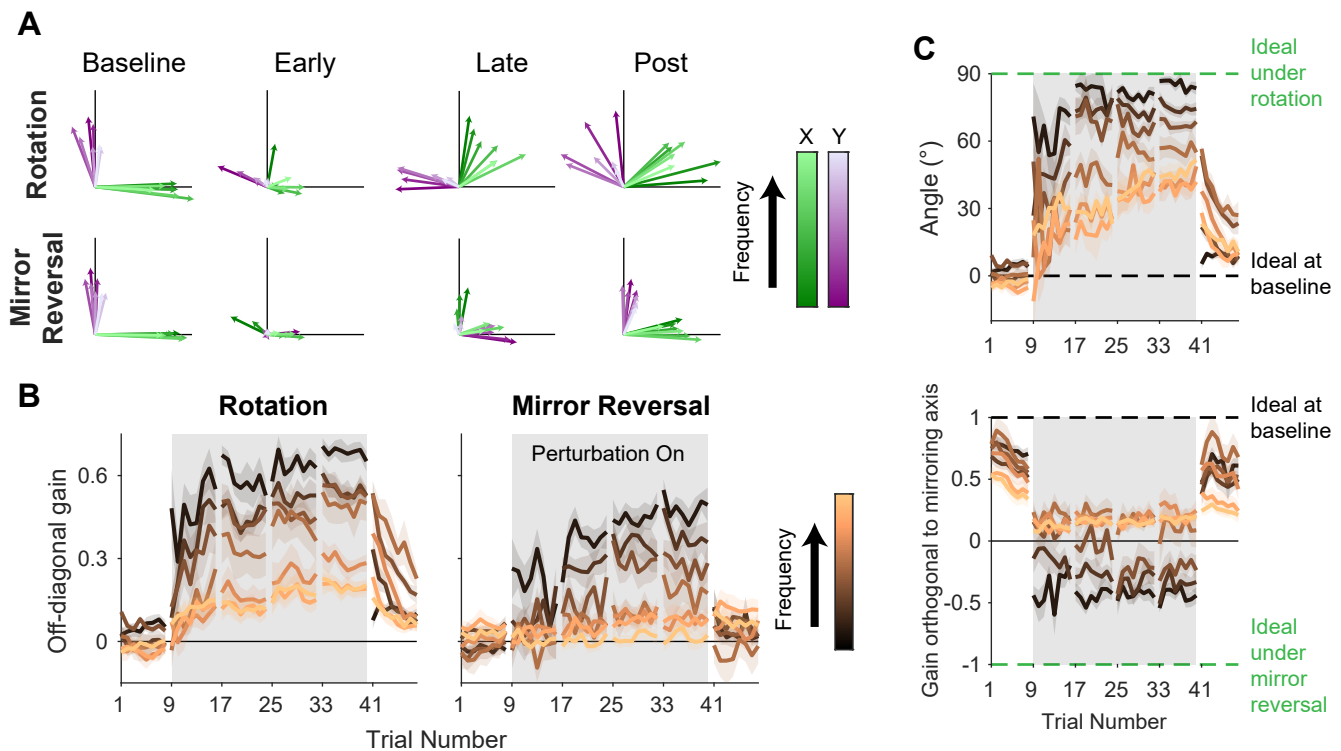

**Figure 5.** Adaptation and *de novo* learning exhibit distinct frequency-dependent signatures. We estimated how participants transformed target motion into hand movement across different frequencies (i.e., gain matrix analysis). For all panels, neighboring  $x$ - and  $y$ -target frequencies were paired together in numerical order. The resulting 7 frequency pairings were ( $x$  then  $y$  frequencies reported in each parentheses in Hz): (0.1, 0.15), (0.25, 0.35), (0.55, 0.65), (0.85, 0.95), (1.15, 1.45), (1.55, 1.85), (2.05, 2.15). See Methods for details on how gain matrices were fit. **A.** Visualizations of the estimated gain matrices relating target motion to hand motion across frequencies. These visualizations were generated from one trial of each listed block, averaged across participants. Green and purple arrows depict hand responses to  $x$ - and  $y$ -target frequencies, respectively. Darker colors represent lower frequencies and lighter colors represent higher frequencies. The gain matrices associated with these visualizations can be found in **Figure 5–Figure Supplement 2**. **B.** Average of the two off-diagonal values of the gain matrices at different points during learning. Darker colors represent lower frequencies and lighter colors represent higher frequencies. Grey boxes indicate when the rotation or mirror reversal were applied. Error bars are SEM across participants. **C.** (Top) Estimated compensation angle for the rotation group as a function of frequency at different points during learning. (Bottom) Gain of movement orthogonal to the mirroring axis for the mirror-reversal group. Green and black dashed lines show ideal compensation when the perturbation is or is not applied, respectively. Darker colors represent lower frequencies and lighter colors represent higher frequencies. Error bars are SEM across participants.

**Figure 5–Figure supplement 1.** Example gain matrices for each block and frequency

**Figure 5–Figure supplement 2.** Gain matrix analysis performed on single-subject data

272 two different perturbations; perfect compensation would lead to identical *amplitude* spectra for  
 273 each perturbation. In order to distinguish these responses, we needed to determine not just  
 274 the amplitude, but the direction of the response along each axis, i.e. whether it was positive or  
 275 negative. We used *phase* information to disambiguate the direction of the response (the sign of  
 276 the gain) by assuming that the phase of the response at each frequency would remain similar to  
 277 baseline throughout learning. We then used this information to estimate signed gain matrices which  
 278 describe the linear transformations relating target and hand motion (**Figure 5–Figure Supplement**  
 279 **1**). These matrices relay similar information as the alignment matrices in **Figure 3** except here,  
 280 different transformations were estimated for different frequencies of movement. To construct  
 281 these gain matrices, the hand responses from neighboring pairs of  $x$ - and  $y$ -target frequencies  
 282 were grouped together. This grouping was performed because target movement at any given  
 283 frequency was one dimensional, but target movement across two neighboring frequencies was  
 284 two dimensional; examining hand/target movements in this way thus provided two-dimensional  
 285 insight into how the rotation/mirroring of hand responses varied across the frequency spectrum

286 (see "Frequency-domain analysis" in Methods for details).

287 Similar to the trajectory-alignment analysis, these gain matrices should be close to the identity  
288 matrix at baseline but equal the inverse of the matrix describing the perturbation if participants are  
289 able to perfectly compensate for the perturbation. We again visualized these estimated frequency-  
290 dependent gain matrices through their effect on the unit  $x$  and  $y$  vectors (the columns of the gain  
291 matrices; **Figure 5A**: average across subjects, **Figure 5-Figure Supplement 2**: single subjects), only  
292 now we include a set of vectors for each pair of neighboring frequencies.

293 At baseline, participants in both groups responded to  $x$ - and  $y$ -target motion by moving their  
294 hands in the  $x$ - and  $y$ -axes, respectively, with similar performance across all target frequencies.  
295 Late in learning, for the rotation group, participants successfully compensated for the perturbation  
296 - apparent through the fact that all vectors rotated clockwise during learning. The extent of  
297 compensation, however, was not uniform across frequencies but was more complete at low  
298 frequencies (darker arrows) than at high frequencies (lighter arrows). For the mirror-reversal group,  
299 compensation during late learning occurred most successfully at low frequencies, apparent as the  
300 darker vectors flipping across the mirror axis relative to baseline. At high frequencies, however,  
301 responses failed to flip across the mirror axis and remained similar to baseline.

302 To quantify these observations statistically, we focused again on the off-diagonal elements of  
303 the estimated gain matrices. The rotation group's gain matrices were altered in the appropriate  
304 direction to counter the perturbation at all frequencies (**Figure 5B**; linear mixed effects model [see  
305 "Statistics" in methods for details about the structure of the model]: 3-way interaction between  
306 block and frequency,  $F(12, 360) = 3.20$ ,  $p = 0.0002$ ; data split by frequency for post hoc Tukey's  
307 range test: Bonferroni-adjusted  $p < 0.0001$  for all frequencies). Although the mirror-reversal group's  
308 low-frequency gain matrices were also altered in the appropriate direction (Tukey's range test:  
309 Bonferroni-adjusted  $p < 0.0003$  for lowest 3 frequencies), the high-frequency gain matrices were not  
310 significantly different from baseline (Tukey's range test: Bonferroni-adjusted  $p > 0.2$  for highest 4  
311 frequencies; baseline gain range:  $-0.18$ - $0.18$ ; late-learning gain range:  $-0.25$ - $0.66$ ).

312 Fitting a rotation matrix to the rotation group's gain matrix at each frequency revealed that  
313 participants' baseline compensation angle was close to  $0^\circ$  at all frequencies (**Figure 5C**). By late  
314 learning, compensation was nearly perfect at the lowest frequency but was only partial at higher  
315 frequencies. For the mirror-reversal group, the gains of participants' low-frequency movements  
316 orthogonal to the mirror axis were positive at baseline and became negative during learning,  
317 appropriate to counter the perturbation. At high frequencies, by contrast, the gain reduced slightly  
318 during learning but never became negative. Thus, both groups of participants were successful at  
319 compensating at low frequencies, but at high frequencies, the rotation group was only partially  
320 successful and the mirror-reversal group was largely unsuccessful.

321 Post-learning, the rotation group's off-diagonal gains were significantly different from baseline  
322 for all frequencies except the lowest frequency (**Figure 5B**; Tukey's range test: Bonferroni-adjusted  
323  $p < 0.005$  for highest 6 frequencies), indicating aftereffects. A similar trend was evident in partici-  
324 pants' estimated compensation angles (**Figure 5C**). By contrast, the mirror-reversal group's matrices  
325 were not significantly different from baseline across all frequencies (**Figure 5B**; Tukey's range test:  
326 Bonferroni-adjusted  $p > 0.9$  for all frequencies; baseline gain range:  $-0.18$ - $0.18$ ; post-learning gain  
327 range:  $-0.49$  to  $0.37$ ). The gains orthogonal to the mirroring axis were also similar to baseline across  
328 all frequencies, indicating the absence of aftereffects (**Figure 5C**).

329 To summarize, compensation for the visuomotor rotation resulted in reach-direction afteref-  
330 fects of similar magnitude to that reported in previous studies (**Figure 5**). Compensation was also  
331 expressed at both low and high frequencies of movement (**Figure 5B**). The fact that participants  
332 exhibited low-frequency compensation is, to some extent, not surprising because the low frequen-  
333 cies in our task required movements that were slower than that at high frequencies. However,  
334 previous studies have demonstrated that adaptation generalizes strongly to rapid online corrective  
335 movements (*Ahmedi-Pajouh et al., 2012; Cluff and Scott, 2013; Telgen et al., 2014*), which would  
336 be reflected in our experiment as an ability to perform tracking at high frequencies. Thus, these

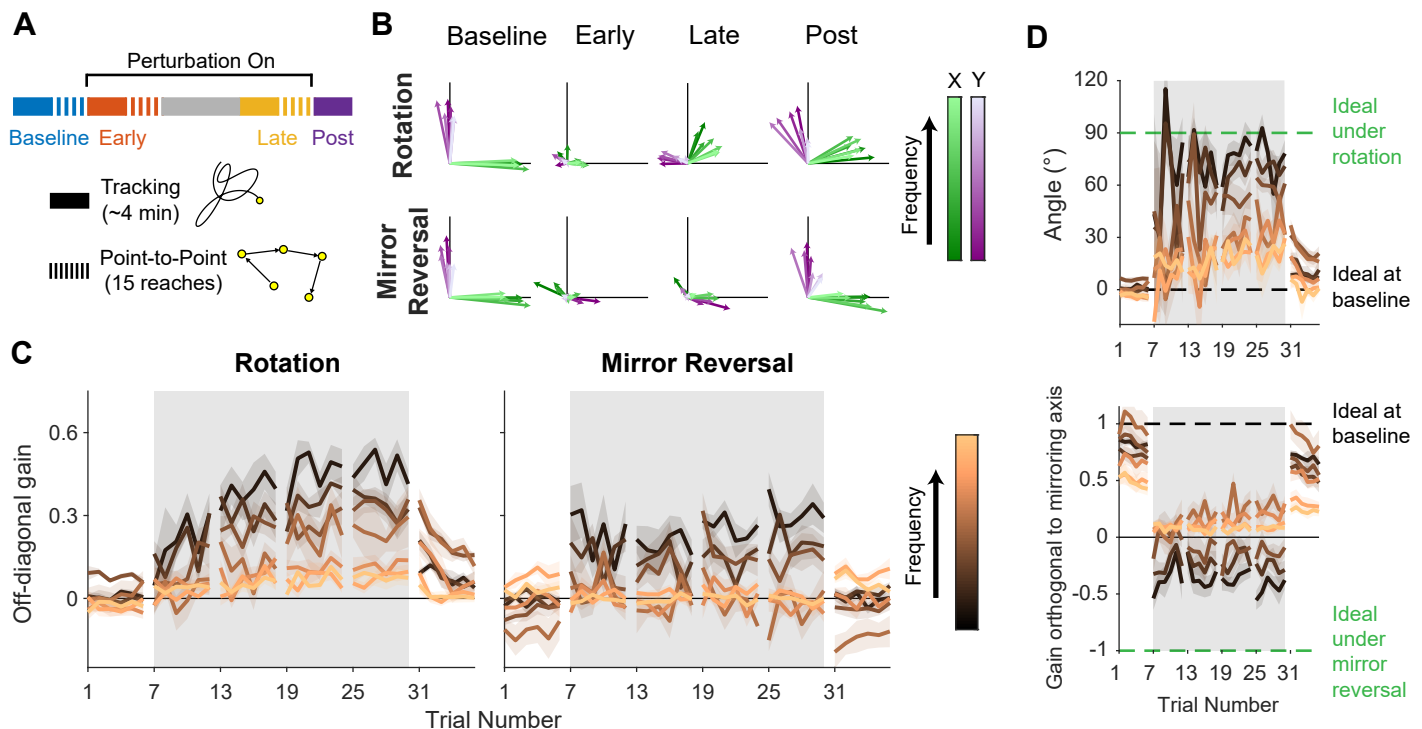

**Figure 6.** Making point-to-point reaches improves tracking performance, especially under mirror reversal. **A.** Participants learned to counter either a visuomotor rotation ( $n = 10$ ) or mirror-reversal ( $n = 10$ ). The experimental design was similar to the main experiment except point-to-point reaching practice was almost entirely eliminated; between the early- and late-learning tracking blocks, participants only performed 15 point-to-point reaches. The purpose of these reaches was not for training but simply to assess learning in the point-to-point task. **B–D.** Gain matrix analysis, identical to that in **Figure 5**, performed on data from the follow-up experiment. **B.** Visualization of the gain matrix from one trial of each listed block, averaged across participants. **C.** Off-diagonal elements of the gain matrices, averaged across participants. **D.** Estimated rotation angle for the rotation group's gain matrices (upper) and gain orthogonal to mirroring axis for the mirror-reversal group (lower), averaged across participants. All error bars in this figure are SEM across participants.

**Figure 6–Figure supplement 1.** Gain matrix analysis performed on single-subject data for the follow-up experiment

337 data suggest that rotation learning engages adaptation, in agreement with previous studies. In  
 338 contrast, the mirror-reversal group did not exhibit aftereffects and only expressed compensation at  
 339 low frequencies. The lack of aftereffects suggests that participants did not learn through adaptation  
 340 of an existing controller, but instead learned by building a new controller from scratch—i.e., through  
 341 *de novo* learning (**Figure 1A**).

342 This *de novo* learning process also appeared to contribute to learning in the rotation group.  
 343 The aftereffects in this group ( $\sim 25^\circ$ ) only accounted for a fraction of the overall compensation  
 344 achieved by this group ( $\sim 70^\circ$ ), suggesting that an additional component of learning also contributed  
 345 to learning to compensate for the rotation. Examining the time course of learning for both groups  
 346 in **Figure 5B**, while the rotation group's gains were overall higher than the mirror-reversal group's,  
 347 there was a striking similarity in the frequency-dependent pattern of learning between the two  
 348 groups. We therefore suggest that the residual learning not accounted for by adaptation was  
 349 attributable to the same *de novo* learning process that drove learning under the mirror reversal.

### 350 Making Point-to-Point Reaches Improves Tracking Performance, Especially under 351 Mirror Reversal

352 Although the data suggest participants did not heavily rely on an aiming strategy while tracking,  
 353 participants likely did use such a strategy to learn to counter the rotation/mirror reversal while  
 354 performing point-to-point reaches. How important might such cognitive strategies be for ultimately  
 355 learning the tracking task? To test this, we performed a follow-up experiment with twenty additional

356 participants. This experiment was similar to the main experiment except for the fact that partici-  
357 pants experienced the rotation or mirror reversal almost exclusively in the tracking task, receiving  
358 minimal practice in the point-to-point task (**Figure 6A**).

359 In comparison to the main experiment, the total amount of compensation expressed during  
360 learning was blunted in both groups (**Figure 6B-D**: average across subjects; **Figure 6-Figure Supple-**  
361 **ment 1**: single subjects). Comparing the the off-diagonal gain at different frequencies of movement,  
362 the decrement in gain from the main experiment to the follow-up experiment was similar between  
363 groups (comparing gains for each group between **Figures 5B** and **6C**). However, the overall trend  
364 in learning was different; while the rotation group's performance improved from early to late  
365 learning, particularly at low frequencies (linear mixed effects model [see "Statistics" in methods for  
366 details about the structure of the model]: 3-way interaction between block, group, and frequency,  
367  $F(18, 461) = 3.20, p < 0.0001$ ; Tukey's range test: Bonferroni-adjusted  $p < 0.05$  for two out of seven  
368 frequencies), the mirror-reversal group's performance plateaued by early learning (Tukey's range  
369 test: Bonferroni-adjusted  $p = 1$  for all frequencies; **Figure 6C**). **Figures 6B** and **D** also demonstrate a  
370 similar difference in learning trends. These results are consistent with previous work comparing  
371 the generalization of rotation learning from pointing to tracking tasks and vice versa (**Abeele and**  
372 **Bock, 2003**). Ultimately, this suggests that training in the point-to-point task played a critical role in  
373 acquiring the ability to track the target under a mirror-reversal learning, but had a lesser impact for  
374 learning the rotation.

375 It is also worth noting that the follow-up experiment reproduced many of the same behavioral  
376 phenomena evident in the main experiment. The rotation group exhibited aftereffects, albeit  
377 only within the middle bandwidth of frequencies (Tukey's range test: Bonferroni-adjusted  $p < 0.05$   
378 for three out of seven frequencies), while the mirror-reversal group did not (Tukey's range test:  
379 Bonferroni-adjusted  $p = 1$  for all seven frequencies). The rotation group exhibited compensation  
380 at high frequencies (Tukey's range test: Bonferroni-adjusted  $p < 0.05$  for two out of three highest  
381 frequencies) whereas the mirror-reversal group did not (Tukey's range test: Bonferroni-adjusted  
382  $p = 1$  for highest three frequencies). In other words, the follow-up experiment provides evidence  
383 that the effects we observed in the main experiment are robust and replicable.

## 384 Discussion

385 In the present study, we tested whether participants could learn to successfully control a cursor  
386 to pursue a continuously moving target under either rotated or mirror-reversed visual feedback.  
387 Although previous work has established that participants can learn to compensate for these  
388 perturbations during point-to-point movements, this compensation often seems to be depend upon  
389 the use of re-aiming strategies—a solution that is time-consuming and therefore does not seem  
390 feasible in a task in which goals are constantly changing. Although it is possible that participants  
391 might have performed the tracking task through numerous, intermittent catch-up movements, we  
392 found that, under both perturbations, participants' tracking behavior was close to linear across  
393 all frequencies (as quantified by spectral coherence), implying instead that they tracked the target  
394 smoothly and continuously. As expected, we found that participants who learned to counter the  
395 visuomotor rotation exhibited strong aftereffects once the perturbation was removed, amounting  
396 to an approximately  $25^\circ$  rotation of hand motion relative to target motion—consistent with previous  
397 findings in point-to-point tasks (**Taylor et al., 2010; Fernández-Ruiz et al., 2011; Taylor and Ivry,**  
398 **2011; Bond and Taylor, 2015**). In contrast, participants who learned to compensate for the mirror-  
399 reversal showed no aftereffects, suggesting that they did not engage adaptation of their existing  
400 controller, but instead learned to compensate by establishing a *de novo* controller.

401 One potential caveat of our results is that if the mirror-reversal group expressed a quickly  
402 decaying aftereffect (e.g., decaying within a single trial), the temporal resolution of our analysis  
403 (tracking analysis performed in 40 second bins) may not have been fine enough to capture such a  
404 phenomenon. Indeed, prior work has demonstrated that motor learning can occur on very fast  
405 timescales, even when learning to counter random, unexpected perturbations (**Crevecoeur et al.,**

206 **2020a,b**). However, the timescale of decay that would be necessary to give rise to such a result is  
207 so starkly different from that in the rotation group (on the order of several minutes) that it seems  
208 unlikely the same learning mechanism can account for behavior in both groups of participants. In  
209 summary, our results corroborate previous findings which suggest that people learn to counter  
210 rotations and mirror reversals of visual feedback in qualitatively different ways.

### 211 **Frequency-Domain Signatures of Adaptation and *De Novo* Learning**

212 The pattern of compensation under the rotation and mirror-reversal was frequency specific (**Figure**  
213 **5B**), with the nature of compensation at high frequencies revealing distinct signatures of adaptation  
214 and *de novo* learning between the two groups. At low frequencies, both groups of participants  
215 successfully compensated for their perturbations. But at high frequencies, only the rotation group  
216 was able to compensate; behavior for the mirror-reversal group at high frequencies was similar  
217 to baseline behavior. There were similarities, however, in the overall time course and frequency  
218 dependence of learning under each perturbation (**Figure 5B**), with both groups exhibiting a steady  
219 increase in compensation over time, particularly at lower frequencies. Additionally, both groups'  
220 compensation exhibited a similar gradation as a function of frequency, decreasing as frequency  
221 increased.

222 We believe these results show that distinct learning processes drove two separate components  
223 of learning. One component, present only in the rotation group, was expressed uniformly at  
224 all frequencies and likely reflects a parametric adjustment of an existing baseline controller, i.e.,  
225 adaptation. This interpretation is consistent with studies demonstrating that adaptation of point-to-  
226 point movements generalizes to corrections for unexpected perturbations (**Ahmadi-Pajouh et al.,**  
227 **2012; Cluff and Scott, 2013; Telgen et al., 2014**). A second component of learning contributed  
228 to compensation in both groups of participants. This component was expressed primarily at  
229 low frequencies, exhibited a gradation as a function of frequency, and was not associated with  
230 aftereffects. We suggest this component corresponds to formation of a *de novo* controller for the  
231 task. The mirror-reversal group's behavior in **Figure 5B** demonstrates the frequency-dependent  
232 characteristics of this *de novo* learned controller and how those characteristics evolve with practice.

233 The failure to compensate at high frequencies under the mirror-reversal is consistent with the ob-  
234 servation that people who have learned to make point-to-point movements under mirror-reversed  
235 feedback are unable to generate appropriate rapid corrections to unexpected perturbations (**Tel-**  
236 **gen et al., 2014; Kasuga et al., 2015; Gritsenko and Kalaska, 2010**). However, importantly, in the  
237 tracking task, participants were able to generate appropriate motor output continuously, rather  
238 than in a discrete manner, as in the point-to-point task. Although compensation for the rotation  
239 bore many hallmarks of adaptation, it also exhibited features of *de novo* learning seen in the  
240 mirror-reversal group, suggesting that participants in the rotation group employed a combination  
241 of the two learning processes. Our data thus support previous suggestions that residual learning  
242 under a visuomotor rotation that cannot be attributed to implicit adaptation may rely on the same  
243 mechanisms as those used for *de novo* learning (**Krakauer et al., 2019**).

### 244 **Potential Control Architectures Supporting Multiple Components of Learning**

245 The properties of adaptation and *de novo* learning we have identified here can potentially be  
246 explained by the existence of two distinct control pathways, each capable of different forms of  
247 plasticity but with differing sensorimotor delays. An inability to compensate at high frequencies  
248 (when tracking an unpredictable stimulus; see **Roth et al. (2011)**) suggests higher phase lags,  
249 potentially due to greater sensorimotor delays or slower system dynamics; as phase lags approach  
250 the period of oscillation, it becomes impossible to exert precise control at that frequency. One  
251 pathway may be fast but can only be recalibrated through adaptation while the other pathway is  
252 slower but can be reconfigured to implement arbitrary new controllers.

253 These two control pathways might correspond to feedforward control (generating motor output  
254 based purely on target motion) and feedback control (generating motor output based on the cursor

455 location and/or distance between cursor and target). Feedback control is slower than feedforward  
456 control due to the additional delays associated with observing the effects of one's earlier motor  
457 commands on the current cursor position. The observed pattern of behavior may thus be due  
458 to a fast but inflexible feedforward controller that responds rapidly to target motion, but always  
459 expresses baseline behavior (potentially recalibrated via implicit adaptation) interacting with a slow  
460 but reconfigurable feedback controller that responds to both target motion and the current cursor  
461 position. At low frequencies, the target may move slowly enough that any inappropriate feedforward  
462 control to track the target is masked by corrective feedback responses. But at high frequencies, the  
463 target may move too fast for feedback control to be exerted, leaving only inappropriate feedforward  
464 responses.

465 An alternative possibility is that there may be multiple feedforward controllers (and/or feedback  
466 controllers) incurring different delays. A fast but inflexible baseline controller (amenable to recalibra-  
467 tion through adaptation) might interact with a slower but more flexible controller. This organization  
468 parallels dual-process theories of learning and action selection (*Hardwick et al., 2019; Day and*  
469 *Lyon, 2000; Huberdeau et al., 2015*) and raises the possibility that the *de novo* learning exhibited by  
470 our participants might be, in some sense, cognitive in nature. Cognitive processes are generally  
471 conceived of in terms of discrete associations that require time-consuming, deliberative processing  
472 to compute—consistent with the use of re-aiming strategies (*McDougle et al., 2016; Huberdeau*  
473 *et al., 2015*). It is possible, however, for action selection to occur rapidly but still be considered  
474 cognitive. For instance, it has been proposed that stimulus-response associations can be “cached”  
475 in working memory, enabling a cognitive response to be deployed rapidly and without deliberation  
476 (*McDougle and Taylor, 2019*). Caching associations in this way appears to be limited to just 2–7  
477 elements (*McDougle and Taylor, 2019; Collins and Frank, 2012*), raising doubts as to whether such  
478 a mechanism could support a feedback controller that must generate output in continuous time  
479 and space. Nevertheless, recent theories have framed prefrontal cortex as a general-purpose  
480 network capable of learning to perform arbitrary computations on its inputs (*Wang et al., 2018*).  
481 From this perspective, it does not seem infeasible that such a network could learn to implement an  
482 arbitrary continuous feedback controller that could reasonably be considered cognitive.

### 483 **Role of Re-Aiming Strategies in Acquisition versus Execution of a *De Novo* Con-** 484 **troller**

485 Although participants likely could not have used an aiming strategy to execute continuous tracking  
486 movements, they could have used such a strategy to acquire the controller necessary to perform  
487 these movements. In a follow-up experiment, we tested whether limited practice in the point-to-  
488 point task would impair how well participants could learn to counter the rotation/mirror reversal.  
489 Indeed, we found both groups' performance suffered from the lack of point-to-point practice,  
490 but whereas the rotation group exhibited moderate improvement from early to late learning, the  
491 mirror-reversal group did not improve past early learning. The mirror-reversal group's lack of  
492 learning suggests that re-aiming may be important for initially *building* a *de novo* controller. But  
493 with point-to-point practice, participants demonstrated tracking improvements under the mirror  
494 reversal, suggesting that re-aiming may not be a necessary component of the tracking controller  
495 after the initial phase of learning. Likewise, the rotation group may have exhibited a decrement  
496 in tracking performance without point-to-point training because this prevented the engagement  
497 of re-aiming strategies that may ordinarily facilitate learning of a *de novo* controller, even if the  
498 eventually learned controller does not rely on any form of re-aiming. Improvement in tracking  
499 performance in this rotation group could be due to adaptation, which is thought to be driven only  
500 by sensory prediction errors which would be present and, presumably, also driving learning even  
501 during the tracking task. The poor performance in both groups may also have been attributable to  
502 participants simply spending less total time practicing their respective perturbations. However, if  
503 time on task was the only variable driving learning, then the mirror-reversal group's performance  
504 should have improved from early learning to late learning, which it did not.

505 A re-aiming strategy may be important for building a *de novo* controller because this process  
506 may rely on the deliberative computations performed when planning upcoming movements.  
507 Alternatively, it may be easier for people to evaluate the quality of straight-line reaches (e.g., reach  
508 direction, movement time, task error) compared to random tracking movements, allowing them to  
509 update the parameters of a nascent controller using these quality metrics. In any case, our data  
510 suggest that cognitive strategies/processes may serve a critical role in facilitating *de novo* learning  
511 even if the eventually learned controller does not depend on re-aiming strategies.

### 512 **System Identification as a Tool for Characterizing Motor Learning**

513 Our characterization of learning made use of frequency-based system identification, a powerful tool  
514 that has been previously used to study biological motor control such as insect flight (*Sponberg et al.,*  
515 *2015; Roth et al., 2016*), electric fish refuge tracking (*Cowan and Fortune, 2007; Madhav et al., 2013*),  
516 human posture (*Oie et al., 2002; Kiemel et al., 2006*), and human reaching (*Zimmet et al., 2019*).  
517 This approach has a number of practical advantages over other methods for studying motor control  
518 (e.g., point-to-point reaches)—including time-efficiency for data collection and the availability of a  
519 rich suite of tools in the frequency domain (*Schoukens et al., 2004*). However, to our knowledge,  
520 frequency-based system identification has not previously been applied to investigate motor learning.  
521 Here, we have demonstrated that this approach can not only recapitulate the results of previous  
522 studies but also extend these results to identify distinct components of control. Our approach  
523 is also general as it can be applied to assess learning of arbitrary linear visuomotor mappings  
524 (e.g., 15° rotation, body-machine interfaces (*Mussa-Ivaldi et al., 2011*)). Under previous approaches,  
525 characterizing the quality of movements under different types of learned mappings (rotation, mirror-  
526 reversal) has necessitated different *ad hoc* analyses that cannot be directly compared (*Telgen et al.,*  
527 *2014*). In contrast, our frequency-based approach provides a general method to characterize  
528 behavior under rotations, mirror-reversals, or any linear mapping from effectors to a cursor.

529 While the system identification approach used in the present study does capture learning, the  
530 results obtained using this approach do warrant careful interpretation. In particular, one must not  
531 interpret the empirical relationship that we measure between the target and hand as equivalent to  
532 the input–output relationship of the brain’s motor controller. The former measures the response  
533 of the entire sensorimotor system to external input. The latter only measures how the controller  
534 sends motor commands to the body in response to input from the environment/internal feedback.  
535 Estimating the latter relationship requires a more nuanced approach that takes into account the  
536 closed-loop topology (*Roth et al., 2014*). Despite this, changes to the controller are still revealed  
537 using our approach; assuming that learning only drives changes in the input–output relationship  
538 of the controller—as opposed to, for example, the plant or the visual system—any changes in the  
539 overall target–hand relationship will reflect changes to the controller. Thus, our approach is a valid  
540 way to investigate learning.

541 Although the primary goal of our frequency-based analysis was to establish how participants  
542 mapped target motion into hand motion, system identification yields more detailed information  
543 than this; in principle, it provides complete knowledge of a linear system in that knowing how the  
544 system responds to sinusoidal input at different frequencies enables one to predict how the system  
545 will respond to arbitrary inputs. This data can be used to formally compare different possible  
546 control system architectures (*Zimmet et al., 2019*) supporting learning, and we plan to explore this  
547 more detailed analysis in future work.

### 548 **De Novo Learning and Real-World Skill Learning**

549 We have used the term “*de novo* learning” to refer to any mechanism, aside from implicit adaptation,  
550 that leads to the creation of a new controller. We propose that *de novo* learning proceeds initially  
551 through explicit processes before becoming cached or automatized into a more procedural form.  
552 There are, however, a number of alternative mechanisms that could be engaged to establish a new  
553 controller. One proposal is that *de novo* learning occurs by simultaneously updating forward and

554 inverse models by simple gradient descent (*Pierella et al., 2019*). Another possibility is that a new  
555 controller could be learned through reinforcement learning. In motor learning tasks, reinforcement  
556 has been demonstrated to engage a learning mechanism that is independent of implicit adaptation  
557 (*Izawa and Shadmehr, 2011; Cashaback et al., 2017; Holland et al., 2018*) potentially via basal-  
558 ganglia-dependent mechanisms (*Schultz et al., 1997; Hikosaka et al., 2002*). Such reinforcement  
559 could provide a basis for forming a new controller. Although prior work on motor learning has  
560 focused on simply learning the required direction for a point-to-point movement, theoretical  
561 frameworks for reinforcement learning have been extended to continuous time and space to learn  
562 continuous controllers for robotics (*Doya, 2000; Theodorou et al., 2010; Smart and Kaelbling, 2000;*  
563 *Todorov, 2009*), and such theories could be applicable to how people learned continuous control in  
564 our experiment.

565 Although we have described the mirror-reversal task as requiring *de novo* learning, we acknowl-  
566 edge that there are many types of learning which might be described as *de novo* learning that this  
567 task does not capture. For example, many skills, such as playing the cello, challenge one to learn  
568 how to *execute* new movement patterns that one has never executed before (*Costa, 2011*). This  
569 is not the case in the tracking task which only challenges one to *select* movements one already  
570 knows how to execute. Also, in many cases, one must learn to use information from new sensory  
571 modalities for control (*van Vugt and Ostry, 2018; Bach-y-Rita and W. Kercel, 2003*), such as using  
572 auditory feedback to adjust one's finger positioning while playing the cello. Our task, by contrast,  
573 only uses very familiar visual cues. Nevertheless, we believe that learning a new controller that  
574 maps familiar sensory feedback to well-practiced actions in a novel way is a critical element of  
575 many real-world learning tasks (e.g., driving a car, playing video games) and should be considered a  
576 fundamental aspect of any *de novo* learning.

577 Ultimately, our goal is to understand real-world skill learning. We believe that studying learning  
578 in continuous tracking tasks is important to bring us closer to this goal since a critical component of  
579 many skills is the ability to continuously control an effector in response to ongoing external events,  
580 like in juggling or riding a bicycle. Studies of *well-practiced* human behavior in continuous control  
581 tasks has a long history, such as those examining the dynamics of pilot and vehicle interactions  
582 (*McRuer and Jex, 1967*). However, most existing paradigms for studying motor *learning* have  
583 examined only point-to-point movements. We believe the tracking task presented here offers a  
584 simple but powerful approach for characterizing how we learn a new continuous controller and, as  
585 such, provides an important new direction for advancing our understanding of how real-world skills  
586 are acquired.

## 587 **Methods and Materials**

### 588 **Participants**

589 40 right-handed, healthy participants over 18 years of age were recruited for this study ( $24.28 \pm 5.06$   
590 years old; 19 male, 21 female), 20 for the main experiment (*Figures 2-5*) and 20 for the follow-up  
591 experiment (*Figure 6*). Participants all reported having no history of neurological disorders. All  
592 methods were approved by the Johns Hopkins School of Medicine Institutional Review Board.

### 593 **Tasks**

594 Participants made planar movements with their right arm, which was supported by a frictionless air  
595 sled on a table, to control a cursor on an LCD monitor (60 Hz). Participants viewed the cursor on a  
596 horizontal mirror which reflected the monitor (*Figure 1B*). Hand movement was monitored with  
597 a Flock of Birds magnetic tracker (Ascension Technology, VT, USA) at 130 Hz. The (positive)  $x$  axis  
598 was defined as rightward, and the  $y$  axis, forward. The cursor was controlled under three different  
599 hand-to-cursor mappings: 1) veridical, 2) 90° visuomotor rotation, and 3) mirror reversal about the  
600 45° oblique axis in the  $(x, y) = (1, 1)$  direction. Participants were divided evenly into two groups, one  
601 that experienced the visuomotor rotation ( $n = 10$ ; 4 male, 6 female) and one that experienced the



602 mirror reversal ( $n = 10$ ; 6 male, 4 female). Both groups were exposed to the perturbed cursors while  
603 performing two different tasks: 1) the point-to-point task, and 2) the tracking task.

#### 604 Point-to-point task

605 To start a trial, participants were required to move their cursor (circle of radius 2.5 mm) into a target  
606 (grey circle of radius 10 mm) that appeared in the center of the screen. After 500 ms, the target  
607 appeared 12 cm away from the starting location in a random direction. Participants were instructed  
608 to move in a straight line, as quickly and accurately as possible to the new target. Once the cursor  
609 remained stationary (speed  $< 0.065$  m/s) in the new target for 1 sec, the target appeared in a new  
610 location 12 cm away, but constrained to lie within a 20 cm  $\times$  20 cm workspace. Each block used  
611 different, random target locations from other blocks. Blocks in the main experiment consisted  
612 of 150 reaches while blocks in the follow-up experiment (**Figure 6**) consisted of 15 reaches. To  
613 encourage participants to move quickly to each target, we provided feedback at the end of each  
614 trial about the peak velocity they attained during their reaches, giving positive feedback (a pleasant  
615 tone and the target turning yellow) if the peak velocity exceeded roughly 0.39 m/s and negative  
616 feedback (no tone and the target turning blue) if the peak velocity was below that threshold.

#### 617 Tracking task

618 At the start of each trial, a motionless target (grey circle of radius 8 mm) appeared in the center of  
619 the screen, and the trial was initiated when the participant's cursor (circle of radius 2.5 mm) was  
620 stationary (speed  $< 0.065$  m/s) in the target. From then, the target began to move for 46 seconds  
621 in a continuous, pseudo-random trajectory. The first 5 seconds was a ramp period where the  
622 amplitude of the cursor increased linearly from 0 to its full value, and for the remaining 41 seconds,  
623 the target moved at full amplitude. The target moved in a two-dimensional, sum-of-sinusoids  
624 trajectory; fourteen sinusoids of different frequencies, amplitudes and phases were summed to  
625 determine target movement in the  $x$ -axis (frequencies (Hz): 0.1, 0.25, 0.55, 0.85, 1.15, 1.55, 2.05;  
626 amplitudes (cm): 2.31, 2.31, 2.31, 1.76, 1.30, 0.97, 0.73, respectively), and the  $y$ -axis (frequencies  
627 (Hz): 0.15, 0.35, 0.65, 0.95, 1.45, 1.85, 2.15; amplitudes (cm): 2.31, 2.31, 2.31, 1.58, 1.03, 0.81, 0.70,  
628 respectively). Different frequencies were used for the  $x$ - and  $y$ -axes so that hand movements at  
629 a given frequency could be attributed to either  $x$ - or  $y$ -axis target movements. All frequencies  
630 were prime multiples of 0.05 Hz to ensure that the harmonics of any target frequency would not  
631 overlap with any other target frequency. The amplitudes of the sinusoids for all but the lowest  
632 frequencies were proportional to the inverse of their frequency to ensure that each individual  
633 sinusoid had similar peak velocity. We set a ceiling amplitude for low frequencies in order to prevent  
634 target movements that were too large for participants to comfortably track. Note that due to the  
635 construction of the input signal, there were no low-order harmonic relations between any of the  
636 component sinusoids on the input, making it likely that nonlinearities in the tracking dynamics  
637 would manifest as easily discernible harmonic interactions (i.e. extraneous peaks in the output  
638 spectra). Moreover, care was taken to avoid "frequency leakage" by designing discrete Fourier  
639 transform windows that were integer multiples of the base period (20 s), improving our ability to  
640 detect such nonlinearities.

641 Participants were instructed to keep their cursor inside the target for as long as possible during  
642 the trial. The target's color changed to yellow anytime the cursor was inside the target to provide  
643 feedback for their success. One block of the tracking task consisted of eight, 46-second trials,  
644 and the same target trajectory was used for every trial within a block. For different blocks, we  
645 randomized the phases, but not the frequencies, of target sinusoids to produce different trajectories.  
646 We produced five different target trajectories for participants to track in the six tracking blocks.  
647 The trajectory used for baseline and post-learning were the same to allow a better comparison for  
648 aftereffects. All participants tracked the same five target trajectories, but the order in which they  
649 experienced these trajectories was randomized in order to minimize any phase-dependent learning  
650 effects.

## 651 Experiment

652 We first assessed the baseline control of both groups of participants by having them perform one  
653 block of the tracking task followed by one block of the point-to-point task under veridical cursor  
654 feedback. We then applied either the visuomotor rotation or mirror reversal to the cursor, and  
655 used the tracking task to measure their control capabilities during early learning. Afterwards, we  
656 alternated three times between blocks of point-to-point training and blocks of tracking. In total,  
657 each participant received 450 point-to-point reaches of training under perturbed cursor feedback.  
658 Finally, we measured aftereffects post-learning by returning to the veridical mapping and using the  
659 tracking task.

## 660 Data Analysis

661 Analyses were performed in MATLAB R2018b (The Mathworks, Natick, MA, USA) and R version 4.0.2  
662 (RStudio, Inc., Boston, MA, USA) (R Core Team, 2016; Lenth, 2015; Pinheiro et al., 2016; Lenth, 2016).  
663 Figures were created using Adobe Illustrator (Adobe Inc., San Jose, CA, USA).

## 664 Trajectory-alignment analysis

665 In the point-to-point task, we assessed performance by calculating the angular error between  
666 the cursor's initial movement direction and the target direction relative to the start position. To  
667 determine the cursor's initial movement direction, we computed the direction of the cursor's  
668 instantaneous velocity vector ~150 ms after the time of movement initiation. Movement initiation  
669 was defined as the time when the cursor left the start circle on a given trial.

670 In the tracking task, we assessed performance by measuring the average mean-squared error  
671 between the hand and target positions for every trial. For the alignment matrix analysis, we fit  
672 a matrix,  $\hat{M} = \begin{bmatrix} a & b \\ c & d \end{bmatrix}$ , that minimized the mean-squared error between the hand and target  
673 trajectories for every trial. In the latter analysis, the mean-squared error was additionally minimized  
674 in time by delaying the target trajectory relative to the hand. (While the time-delay allowed for  
675 the fairest possible comparison between the hand and target trajectories in subsequent analysis,  
676 changing or eliminating the alignment *did not* qualitatively change our results.) We estimated  $\hat{M}$  as

$$677 \hat{M} = \underset{M}{\operatorname{argmin}} \left\{ \begin{bmatrix} H_x \\ H_y \end{bmatrix} - M \begin{bmatrix} T_x \\ T_y \end{bmatrix} \right\} \quad (1)$$

678 where  $H$  and  $T$  represent hand and target trajectories. These estimated  $\hat{M}$ 's were averaged  
679 element-wise across participants to generate the alignment matrices shown in **Figure 3A**. These  
680 matrices were visualized by plotting their column vectors, also shown in **Figure 3A**.

681 The off-diagonal elements of each participant's alignment matrix were used to calculate the  
682 off-diagonal scaling,  $S$ , in **Figure 3B**:

$$683 S_{\text{rotation}} = \frac{-b+c}{2}, \quad S_{\text{mirror}} = \frac{b+c}{2}. \quad (2)$$

684 Compensation angles,  $\theta$ , for the rotation group's alignment matrices were found using the singular  
685 value decomposition,  $\operatorname{SVD}(\cdot)$ . This is a standard approach which, as described in **Umeyama (1991)**,  
686 identifies a pure rotation,  $R$ , that best describes  $\hat{M}$  irrespective of other transformations (e.g.,  
687 dilation, shear) (**Figure 3C**, left). Briefly,

$$688 U\Sigma V^T = \operatorname{SVD}(\hat{M}^T), \quad (3)$$

$$689 \quad \quad \quad 690 R = VU^T \quad (4)$$

691 where  $U$  and  $V$  contain the left and right singular vectors and  $\Sigma$  contains the singular values.  
692 Note that  $R$  is a rotation matrix only if  $\det(\hat{M}^T) \geq 0$ , but  $R$  is a reflection matrix when  $\det(\hat{M}^T) < 0$ .  
693 Although **Umeyama (1991)** have described a method whereby all  $R$  can be forced to be a rotation

694 matrix, we did not want to impose nonexistent structure onto  $R$  and, thus, did not analyze trials  
 695 which yielded reflection matrices. However, this was not a major issue for the analysis as nearly all  
 696 trials yielded rotation matrices. Subsequently,  $\theta$  was calculated as

$$697 \quad \theta = \text{atan2}(R_{2,1}, R_{1,1}) \quad (5)$$

698 where  $\text{atan2}(\cdot)$  is the 2-argument arctangent.

699 Finally, for the mirror-reversal group, the scaling orthogonal to the mirror axis was found by  
 700 computing how the matrix transformed the unit vector along the orthogonal axis (**Figure 3C**, right):

$$701 \quad S_{\text{orthogonal}} = \frac{1}{2} \left( \begin{bmatrix} 1 & -1 \end{bmatrix} \begin{bmatrix} a & b \\ c & d \end{bmatrix} \begin{bmatrix} 1 \\ -1 \end{bmatrix} \right) = \frac{1}{2}(a - b - c + d). \quad (6)$$

## 702 Frequency-domain analysis

703 To analyze trajectories in the frequency domain, we applied the discrete Fourier transform to  
 704 the target and hand trajectories in every tracking trial. This produced a set of complex numbers  
 705 representing the amplitude and phase of the signal at every frequency. We only analyzed the first  
 706 40 seconds of the trajectory that followed the 5-second ramp period so that our analysis period  
 707 was equivalent to an integer multiple of the base period (20 s). This ensured that we would obtain  
 708 clean estimates of the sinusoids at each target frequency. Amplitude spectra were generated by  
 709 taking double the modulus of the Fourier-transformed hand trajectories at positive frequencies.

710 Spectral coherence was calculated between the target and hand trajectories (**Stoica and Moses,**  
 711 **2005**). To do so, we evaluated the single-input multi-output coherence at every frequency of target  
 712 motion, determining how target motion in one axis elicited hand movement in both axes. This  
 713 best captured the linearity of participants' behavior as using hand movement in only one axis for  
 714 the analysis would only partially capture participants' responses to target movement at a given  
 715 frequency. Calculations were performed using a 1040-sample Blackman-Harris window with 50%  
 716 overlap between segments.

717 During each 40 s stimulus period, we assumed the relationship between target position and  
 718 hand position behavior was well approximated by linear, time-invariant dynamics; this assumption  
 719 was tested using the coherence analysis described above. Under this assumption, pure sinusoidal  
 720 target motion at each frequency should be translated into pure sinusoidal hand motion at the same  
 721 frequency but with different magnitude and phase. The relationship between hand and target can  
 722 therefore be described in terms of a  $2 \times 2$  matrix of transfer functions describing the behavior of the  
 723 system at each possible frequency:

$$724 \quad \begin{bmatrix} H_x(\omega) \\ H_y(\omega) \end{bmatrix} = P(\omega) \begin{bmatrix} T_x(\omega) \\ T_y(\omega) \end{bmatrix}, \quad P(\omega) = \begin{bmatrix} p_{xx}(\omega) & p_{xy}(\omega) \\ p_{yx}(\omega) & p_{yy}(\omega) \end{bmatrix}. \quad (7)$$

725 Here,  $H(\omega)$  and  $T(\omega)$  are the Fourier transforms of the time-domain hand and target trajectories,  
 726 respectively, and  $\omega$  is the frequency of movement. Each element of  $P(\omega)$  represents a transfer  
 727 function relating a particular axis of target motion to a particular axis of hand motion; the first and  
 728 second subscripts represent the hand- and target-movement axes, respectively. Each such transfer  
 729 function is a complex-valued function of frequency, which can further be decomposed into gain  
 730 and phase components, e.g.:

$$731 \quad p_{xy}(\omega) = g_{xy}(\omega)e^{i\phi_{xy}(\omega)}, \quad (8)$$

732 where  $g_{xy}(\omega)$  describes the gain (ratio of amplitudes) between  $y$ -target and  $x$ -hand motion as a  
 733 function of frequency, and  $\phi_{xy}(\omega)$  describes the corresponding difference in the phase of oscillation.

734 We estimated the elements of  $P(\omega)$  for frequencies at which the target moved by first noting  
 735 that, for  $x$ -axis frequencies  $\omega$ ,  $T_y(\omega) = 0$ . Consequently,

$$736 \quad \begin{bmatrix} H_x(\omega) \\ H_y(\omega) \end{bmatrix} = \begin{bmatrix} p_{xx}(\omega)T_x(\omega) \\ p_{yx}(\omega)T_x(\omega) \end{bmatrix}, \quad (9)$$

737 and we can therefore estimate  $p_{xx}(\omega)$  and  $p_{yx}(\omega)$  as:

$$738 \quad p_{xx}(\omega) = \frac{H_x(\omega)}{T_x(\omega)}, \quad p_{yx}(\omega) = \frac{H_y(\omega)}{T_x(\omega)}. \quad (10)$$

739 These quantities are also known as phasors, complex numbers which describe the gain and  
740 phase relationship between the hand and target. We estimated  $p_{yx}(\omega)$  and  $p_{yy}(\omega)$  analogously at  
741  $y$ -frequencies of target motion.

742 These estimates yielded two elements of the overall transformation matrix  $P(\omega)$  at each fre-  
743 quency of target movement. In order to construct a full  $2 \times 2$  matrix, we paired the gains from  
744 neighboring  $x$ - and  $y$ -frequencies, assuming that participants' behavior would be approximately the  
745 same at neighboring frequencies. For example, the pair of gains from the lowest  $x$ -target frequency  
746 (0.1 Hz) was grouped with the analogous gains from the lowest  $y$ -target frequency (0.15 Hz) to  
747 construct a  $2 \times 2$  matrix.

748 The spatial transformation of target motion into hand motion at each frequency is described by  
749 the gain of each element of  $P(\omega)$ . However, gain and phase data can lead to certain ambiguities;  
750 for example, a positive gain with a phase of  $\pi$  radians is indistinguishable from a negative gain  
751 with a phase of 0. Conventionally, this is resolved by assuming that gain is positive. In our task,  
752 however, the sign of the gain was crucial to disambiguate the directionality of the hand responses  
753 (e.g., whether the hand moved left or right in response to upward target motion). We used phase  
754 information to disambiguate positive from negative gains. Specifically, we assumed that the phase  
755 lag of the hand response at a given frequency would be similar across both axes of hand movement  
756 and throughout the experiment, but the gain would vary:

$$757 \quad p_{xx}(\omega) \approx g_{xx}(\omega)e^{\tilde{\phi}(\omega)}, \quad p_{yx}(\omega) \approx g_{yx}(\omega)e^{\tilde{\phi}(\omega)}. \quad (11)$$

758 For a given movement frequency,  $\tilde{\phi}(\omega)$  was set to be the same as the mean phase lag during the  
759 baseline block, where the gain was unambiguously positive. This assumption enabled us to estimate  
760 a signed gain for each phasor using a least-squares approach. This method thus yielded estimated  
761 gains for each axis of hand motion, at each target frequency, and at each point during learning.  
762 As we did for the transfer-function matrix  $P(\omega)$ , we paired the estimated gains from neighboring  
763 frequencies to obtain a series of seven gain matrices describing, geometrically, how target motion  
764 was translated into hand motion from low to high frequencies. Similar to the alignment matrix  
765 analysis, visualizations of these gain matrices were constructed by plotting the column vectors  
766 of the matrices. Off-diagonal gain, rotation angle, and gain orthogonal to the mirroring axis—all  
767 shown in **Fig 5**—were calculated in the same way as in **Equations 2–6**.

## 768 **Statistics**

769 The primary statistical tests for the main and follow-up experiments were performed using linear  
770 mixed-effects models. Primary mixed-effects models were fit using data from three parts of the  
771 study: 1) alignment matrix analysis in the main experiment, 2) gain matrix analysis in the main  
772 experiment, and 3) gain matrix analysis in the follow-up experiment. The data used in these models  
773 were the off-diagonal values of the transformation and gain matrices. In all models, data from the  
774 first trial of baseline, the last trial of late learning, and the first trial of post-learning were analyzed.  
775 For the follow-up experiment, we also included data from the first trial of early learning. Additionally,  
776 we removed outliers (25 out of 560 data points) from the follow-up experiment data as the effects  
777 demonstrated by most subjects were either greatly magnified or attenuated by one or two subjects.  
778 Outliers were defined as data that was 1.5 interquartile ranges outside the data from a given trial  
779 and group. Outlier rejection was not performed on data from the main experiment. Using Wilkinson  
780 notation, the structure of the model for the alignment matrix analysis was [off-diagonal scaling]  
781 ~ [block of learning] \* [perturbation group] while the structure for both gain matrix analyses was  
782 [off-diagonal gain] ~ [block of learning] \* [perturbation group] \* [frequency of movement]. Data  
783 were grouped within subjects.

784 We subsequently performed post-hoc statistical comparisons as needed for each of the linear  
785 mixed-effects models. For the alignment matrix analysis, we performed pairwise comparisons using  
786 Tukey's range test. For the gain matrix analysis in the main and follow-up experiments, there was  
787 a 3-way interaction between frequency and the other regressors, so we fit seven different mixed-  
788 effects models for each frequency of movement post-hoc. We performed pairwise comparisons on  
789 these frequency-specific models using Tukey's range test, Bonferroni correcting by the number of  
790 fitted models (i.e., 7).

### 791 **Data and Code Availability**

792 The data and code used to produce the results in this study can be found here: [Johns Hopkins](#)  
793 [University Data Archive](#)

### 794 **Competing Interests**

795 The authors declare no competing interests.

### 796 **Acknowledgments**

797 We thank Amanda Zimmet, John Krakauer, Amy Bastian, and Christopher Fetsch for immensely  
798 helpful discussions. This material is based upon work supported by the National Science Foundation  
799 under Grant No. 1825489. C.S.Y. was supported by NIH 5T32NS091018-17, 5T32NS091018-18, and  
800 the Link Foundation Modeling, Simulation & Training Fellowship.

### 801 **References**

- 802 **Abdelghani MN**, Lillicrap TP, Tweed DB. Sensitivity derivatives for flexible sensorimotor learning. *Neural*  
803 *Comput.* 2008 Aug; 20(8):2085–2111. doi: [10.1162/neco.2008.04-07-507](https://doi.org/10.1162/neco.2008.04-07-507).
- 804 **Abeebe S**, Bock O. Transfer of Sensorimotor Adaptation between Different Movement Categories. *Exp Brain Res.*  
805 2003 Jan; 148(1):128–132. doi: [10.1007/s00221-002-1317-0](https://doi.org/10.1007/s00221-002-1317-0).
- 806 **Ahmadi-Pajouh MA**, Towhidkhal F, Shadmehr R. Preparing to Reach: Selecting an Adaptive Long-Latency  
807 Feedback Controller. *J Neurosci.* 2012 Jul; 32(28):9537–9545. doi: [10.1523/JNEUROSCI.4275-11.2012](https://doi.org/10.1523/JNEUROSCI.4275-11.2012).
- 808 **Bach-y-Rita P**, W Kercel S. Sensory Substitution and the Human–Machine Interface. *Trends in Cognitive Sciences.*  
809 2003 Dec; 7(12):541–546. doi: [10.1016/j.tics.2003.10.013](https://doi.org/10.1016/j.tics.2003.10.013).
- 810 **Bock O**. Basic principles of sensorimotor adaptation to different distortions with different effectors and  
811 movement types: a review and synthesis of behavioral findings. *Front Hum Neurosci.* 2013 Mar; 7:81. doi:  
812 [10.3389/fnhum.2013.00081](https://doi.org/10.3389/fnhum.2013.00081).
- 813 **Bock O**, Schneider S. Acquisition of a sensorimotor skill in younger and older adults. *Acta Physiol Pharmacol*  
814 *Bulg.* 2001 Dec; 26(1-2):89–92.
- 815 **Bock O**, Schneider S, Bloomberg J. Conditions for interference versus facilitation during sequential sensorimotor  
816 adaptation. *Exp Brain Res.* 2001 Jan; 138(3):359–365. doi: [10.1007/s002210100704](https://doi.org/10.1007/s002210100704).
- 817 **Bond KM**, Taylor JA. Flexible Explicit but Rigid Implicit Learning in a Visuomotor Adaptation Task. *J Neurophysiol.*  
818 2015 Jun; 113(10):3836–3849. doi: [10.1152/jn.00009.2015](https://doi.org/10.1152/jn.00009.2015).
- 819 **Cashaback JGA**, McGregor HR, Mohatarem A, Gribble PL. Dissociating Error-Based and Reinforcement-Based  
820 Loss Functions during Sensorimotor Learning. *PLoS Comput Biol.* 2017 Jul; 13(7):e1005623. doi: [10.1371/jour-](https://doi.org/10.1371/journal.pcbi.1005623)  
821 [nal.pcbi.1005623](https://doi.org/10.1371/journal.pcbi.1005623).
- 822 **Choi JT**, Bastian AJ. Adaptation Reveals Independent Control Networks for Human Walking. *Nat Neurosci.* 2007  
823 Aug; 10(8):1055–1062. doi: [10.1038/nn1930](https://doi.org/10.1038/nn1930).
- 824 **Cluff T**, Scott SH. Rapid Feedback Responses Correlate with Reach Adaptation and Properties of Novel Upper  
825 Limb Loads. *J Neurosci.* 2013 Oct; 33(40):15903–15914. doi: [10.1523/JNEUROSCI.0263-13.2013](https://doi.org/10.1523/JNEUROSCI.0263-13.2013).
- 826 **Collins AGE**, Frank MJ. How Much of Reinforcement Learning Is Working Memory, Not Reinforcement Learning?  
827 A Behavioral, Computational, and Neurogenetic Analysis. *Eur J Neurosci.* 2012 Apr; 35(7):1024–1035. doi:  
828 [10.1111/j.1460-9568.2011.07980.x](https://doi.org/10.1111/j.1460-9568.2011.07980.x).

- 829 **Costa RM.** A Selectionist Account of de Novo Action Learning. *Curr Opin Neurobiol.* 2011 Aug; 21(4):579–586.  
830 doi: [10.1016/j.conb.2011.05.004](https://doi.org/10.1016/j.conb.2011.05.004).
- 831 **Cowan NJ, Fortune ES.** The Critical Role of Locomotion Mechanics in Decoding Sensory Systems. *J Neurosci.*  
832 2007 Jan; 27(5):1123–1128. doi: [10.1523/JNEUROSCI.4198-06.2007](https://doi.org/10.1523/JNEUROSCI.4198-06.2007).
- 833 **Craik KJW.** Theory of the human operator in control systems. I. The operator as an engineering system. *Br J*  
834 *Psychol.* 1947 Dec; 38:56–61.
- 835 **Crevecoeur F, Mathew J, Bastin M, Lefèvre P.** Feedback Adaptation to Unpredictable Force Fields in 250 ms.  
836 *eNeuro.* 2020; 7(2). doi: [10.1523/ENEURO.0400-19.2020](https://doi.org/10.1523/ENEURO.0400-19.2020).
- 837 **Crevecoeur F, Thonnard JL, Lefèvre P.** A Very Fast Time Scale of Human Motor Adaptation: Within Movement  
838 Adjustments of Internal Representations during Reaching. *eNeuro.* 2020; 7(1). doi: [10.1523/ENEURO.0149-19.2019](https://doi.org/10.1523/ENEURO.0149-19.2019).
- 840 **Day BL, Lyon IN.** Voluntary Modification of Automatic Arm Movements Evoked by Motion of a Visual Target. *Exp*  
841 *Brain Res.* 2000 Jan; 130(2):159–168. doi: [10.1007/s002219900218](https://doi.org/10.1007/s002219900218).
- 842 **Doya K.** Reinforcement Learning in Continuous Time and Space. *Neural Comput.* 2000 Jan; 12(1):219–245. doi:  
843 [10.1162/089976600300015961](https://doi.org/10.1162/089976600300015961).
- 844 **Fernández-Ruiz J, Díaz R.** Prism Adaptation and Aftereffect: Specifying the Properties of a Procedural Memory  
845 System. *Learn Mem.* 1999 Jan; 6(1):47–53.
- 846 **Fernández-Ruiz J, Wong W, Armstrong IT, Flanagan JR.** Relation between Reaction Time and Reach Errors during  
847 Visuomotor Adaptation. *Behav Brain Res.* 2011 May; 219(1):8–14. doi: [10.1016/j.bbr.2010.11.060](https://doi.org/10.1016/j.bbr.2010.11.060).
- 848 **Finley JM, Long A, Bastian AJ, Torres-Oviedo G.** Spatial and Temporal Control Contribute to Step Length  
849 Asymmetry during Split-Belt Adaptation and Hemiparetic Gait. *Neurorehabil Neural Repair.* 2015 Sep;  
850 29(8):786–795. doi: [10.1177/1545968314567149](https://doi.org/10.1177/1545968314567149).
- 851 **Gritsenko V, Kalaska JF.** Rapid Online Correction Is Selectively Suppressed during Movement with a Visuomotor  
852 Transformation. *J Neurophysiol.* 2010 Dec; 104(6):3084–3104. doi: [10.1152/jn.00909.2009](https://doi.org/10.1152/jn.00909.2009).
- 853 **Gutierrez-Garralda JM, Moreno-Briseño P, Boll MC, Morgado-Valle C, Campos-Romo A, Diaz R, Fernandez-Ruiz**  
854 **J.** The Effect of Parkinson's Disease and Huntington's Disease on Human Visuomotor Learning. *Eur J Neurosci.*  
855 2013 Sep; 38(6):2933–2940. doi: [10.1111/ejn.12288](https://doi.org/10.1111/ejn.12288).
- 856 **Hadjiosif AM, Krakauer JW, Haith AM.** Did we get sensorimotor adaptation wrong? Implicit adaptation as direct  
857 policy updating rather than forward-model-based learning. *bioRxiv.* 2020 Jan; doi: [10.1101/2020.01.22.914473](https://doi.org/10.1101/2020.01.22.914473).
- 858 **Haith AM, Huberdeau DM, Krakauer JW.** The Influence of Movement Preparation Time on the Expression of  
859 Visuomotor Learning and Savings. *J Neurosci.* 2015 Apr; 35(13):5109–5117. doi: [10.1523/JNEUROSCI.3869-14.2015](https://doi.org/10.1523/JNEUROSCI.3869-14.2015).
- 860
- 861 **Hardwick RM, Forrence AD, Krakauer JW, Haith AM.** Time-Dependent Competition between Goal-Directed and  
862 Habitual Response Preparation. *Nat Hum Behav.* 2019 Sep; 3(12):1252–1262. doi: [10.1038/s41562-019-0725-0](https://doi.org/10.1038/s41562-019-0725-0).
- 863 **Hikosaka O, Nakamura K, Sakai K, Nakahara H.** Central Mechanisms of Motor Skill Learning. *Curr Opin*  
864 *Neurobiol.* 2002 Apr; 12(2):217–222. doi: [10.1016/s0959-4388\(02\)00307-0](https://doi.org/10.1016/s0959-4388(02)00307-0).
- 865 **Holland P, Codol O, Galea JM.** Contribution of Explicit Processes to Reinforcement-Based Motor Learning. *J*  
866 *Neurophysiol.* 2018 Jan; 119(6):2241–2255. doi: [10.1152/jn.00901.2017](https://doi.org/10.1152/jn.00901.2017).
- 867 **Huberdeau DM, Krakauer JW, Haith AM.** Dual-Process Decomposition in Human Sensorimotor Adaptation.  
868 *Curr Opin Neurobiol.* 2015 Aug; 33:71–77. doi: [10.1016/j.conb.2015.03.003](https://doi.org/10.1016/j.conb.2015.03.003).
- 869 **Izawa J, Shadmehr R.** Learning from Sensory and Reward Prediction Errors during Motor Adaptation. *PLoS*  
870 *Comput Biol.* 2011 Mar; 7(3):e1002012. doi: [10.1371/journal.pcbi.1002012](https://doi.org/10.1371/journal.pcbi.1002012).
- 871 **Jayakumar RP, Madhav MS, Savelli F, Blair HT, Cowan NJ, Knierim JJ.** Recalibration of path integration in  
872 hippocampal place cells. *Nature.* 2019; 566(745):533–537. doi: [10.1038/s41586-019-0939-3](https://doi.org/10.1038/s41586-019-0939-3).
- 873 **Kasuga S, Telgen S, Ushiba J, Nozaki D, Diedrichsen J.** Learning Feedback and Feedforward Control in a Mirror-  
874 Reversed Visual Environment. *J Neurophysiol.* 2015 Oct; 114(4):2187–2193. doi: [10.1152/jn.00096.2015](https://doi.org/10.1152/jn.00096.2015).

- 875 **Kiemel T**, Oie KS, Jeka JJ. Slow Dynamics of Postural Sway Are in the Feedback Loop. *J Neurophysiol.* 2006 Mar;  
876 95(3):1410–1418. doi: [10.1152/jn.01144.2004](https://doi.org/10.1152/jn.01144.2004).
- 877 **Kluzik J**, Diedrichsen J, Shadmehr R, Bastian AJ. Reach Adaptation: What Determines Whether We Learn an  
878 Internal Model of the Tool or Adapt the Model of Our Arm? *J Neurophysiol.* 2008 Sep; 100(3):1455–1464. doi:  
879 [10.1152/jn.90334.2008](https://doi.org/10.1152/jn.90334.2008).
- 880 **Krakauer JW**, Ghilardi MF, Ghez C. Independent Learning of Internal Models for Kinematic and Dynamic Control  
881 of Reaching. *Nat Neurosci.* 1999 Nov; 2(11):1026–1031. doi: [10.1038/14826](https://doi.org/10.1038/14826).
- 882 **Krakauer JW**, Hadjiosif AM, Xu J, Wong AL, Haith AM. Motor Learning. *Compr Physiol.* 2019 Mar; 9(2):613–663.  
883 doi: [10.1002/cphy.c170043](https://doi.org/10.1002/cphy.c170043).
- 884 **Lackner JR**, Dizio P. Rapid Adaptation to Coriolis Force Perturbations of Arm Trajectory. *J Neurophysiol.* 1994  
885 Jul; 72(1):299–313. doi: [10.1152/jn.1994.72.1.299](https://doi.org/10.1152/jn.1994.72.1.299).
- 886 **Lenth RV**. estimability: Tools for Assessing Estimability of Linear Predictions; 2015, [https://CRAN.R-project.org/](https://CRAN.R-project.org/package=estimability)  
887 [package=estimability](https://CRAN.R-project.org/package=estimability), r package version 1.1-1.
- 888 **Lenth RV**. Least-Squares Means: The R Package lsmeans. *J Stat Softw.* 2016; 69(1):1–33. doi:  
889 [10.18637/jss.v069.i01](https://doi.org/10.18637/jss.v069.i01).
- 890 **Leow LA**, Gunn R, Marinovic W, Carroll TJ. Estimating the Implicit Component of Visuomotor Rotation  
891 Learning by Constraining Movement Preparation Time. *J Neurophysiol.* 2017 Jan; 118(2):666–676. doi:  
892 [10.1152/jn.00834.2016](https://doi.org/10.1152/jn.00834.2016).
- 893 **Lillicrap TP**, Moreno-Briseño P, Diaz R, Tweed DB, Troje NF, Fernandez-Ruiz J. Adapting to Inversion of the Visual  
894 Field: A New Twist on an Old Problem. *Exp Brain Res.* 2013 Jul; 228(3):327–339. doi: [10.1007/s00221-013-](https://doi.org/10.1007/s00221-013-3565-6)  
895 [3565-6](https://doi.org/10.1007/s00221-013-3565-6).
- 896 **Madhav MS**, Stamper SA, Fortune ES, Cowan NJ. Closed-Loop Stabilization of the Jamming Avoidance Response  
897 Reveals Its Locally Unstable and Globally Nonlinear Dynamics. *J Exp Biol.* 2013 Nov; 216(Pt 22):4272–4284.  
898 doi: [10.1242/jeb.088922](https://doi.org/10.1242/jeb.088922).
- 899 **Martin TA**, Keating JG, Goodkin HP, Bastian AJ, Thach WT. Throwing While Looking through Prisms. I. Focal Olivo-  
900 cerebellar Lesions Impair Adaptation. *Brain.* 1996 Aug; 119 (Pt 4):1183–1198. doi: [10.1093/brain/119.4.1183](https://doi.org/10.1093/brain/119.4.1183).
- 901 **Maschke M**, Gomez CM, Ebner TJ, Konczak J. Hereditary Cerebellar Ataxia Progressively Impairs Force Adaptation  
902 during Goal-Directed Arm Movements. *J Neurophysiol.* 2004 Jan; 91(1):230–238. doi: [10.1152/jn.00557.2003](https://doi.org/10.1152/jn.00557.2003).
- 903 **Mazzoni P**, Krakauer JW. An Implicit Plan Overrides an Explicit Strategy during Visuomotor Adaptation. *J*  
904 *Neurosci.* 2006 Apr; 26(14):3642–3645. doi: [10.1523/JNEUROSCI.5317-05.2006](https://doi.org/10.1523/JNEUROSCI.5317-05.2006).
- 905 **McDougle SD**, Ivry RB, Taylor JA. Taking Aim at the Cognitive Side of Learning in Sensorimotor Adaptation Tasks.  
906 *Trends Cogn Sci (Regul Ed).* 2016 Jul; 20(7):535–544. doi: [10.1016/j.tics.2016.05.002](https://doi.org/10.1016/j.tics.2016.05.002).
- 907 **McDougle SD**, Taylor JA. Dissociable Cognitive Strategies for Sensorimotor Learning. *Nat Commun.* 2019 Mar;  
908 10(1):40. doi: [10.1038/s41467-018-07941-0](https://doi.org/10.1038/s41467-018-07941-0).
- 909 **McRuer DT**, Jex HR. A Review of Quasi-Linear Pilot Models. *IEEE Trans Hum Factors Electron.* 1967 Sep;  
910 HFE-8(3):231–249. doi: [10.1109/THFE.1967.234304](https://doi.org/10.1109/THFE.1967.234304).
- 911 **Miall RC**, Weir DJ, Stein JF. Intermittency in Human Manual Tracking Tasks. *J of Mot Behav.* 1993 04; 25:53–63.  
912 doi: [10.1080/00222895.1993.9941639](https://doi.org/10.1080/00222895.1993.9941639).
- 913 **Miall RC**, Weir DJ, Wolpert DM, Stein JF. Is the Cerebellum a Smith Predictor? *J Mot Behav.* 1993 Sep; 25(3):203–  
914 216. doi: [10.1080/00222895.1993.9942050](https://doi.org/10.1080/00222895.1993.9942050).
- 915 **Morehead JR**, Qasim SE, Crossley MJ, Ivry R. Savings upon Re-Aiming in Visuomotor Adaptation. *J Neurosci.*  
916 2015 Oct; 35(42):14386–14396. doi: [10.1523/JNEUROSCI.1046-15.2015](https://doi.org/10.1523/JNEUROSCI.1046-15.2015).
- 917 **Morehead JR**, Taylor JA, Parvin DE, Ivry RB. Characteristics of Implicit Sensorimotor Adaptation Revealed by  
918 Task-Irrelevant Clamped Feedback. *J Cogn Neurosci.* 2017 Jun; 29(6):1061–1074. doi: [10.1162/jocn\\_a\\_01108](https://doi.org/10.1162/jocn_a_01108).
- 919 **Morton SM**, Bastian AJ. Cerebellar Contributions to Locomotor Adaptations during Splitbelt Treadmill Walking.  
920 *J Neurosci.* 2006 Sep; 26(36):9107–9116. doi: [10.1523/JNEUROSCI.2622-06.2006](https://doi.org/10.1523/JNEUROSCI.2622-06.2006).

- 921 **Mussa-Ivaldi FA**, Casadio M, Danziger ZC, Mosier KM, Scheidt RA. Sensory motor remapping of space in  
922 human-machine interfaces. *Prog Brain Res.* 2011; 191:45–64. doi: [10.1016/B978-0-444-53752-2.00014-X](https://doi.org/10.1016/B978-0-444-53752-2.00014-X).
- 923 **Oie KS**, Kiemel T, Jeka JJ. Multisensory Fusion: Simultaneous Re-Weighting of Vision and Touch for the Control of  
924 Human Posture. *Brain Res Cogn Brain Res.* 2002 Jun; 14(1):164–176.
- 925 **Pierella C**, Casadio M, Mussa-Ivaldi FA, Solla SA. The dynamics of motor learning through the formation of  
926 internal models. *PLoS Comput Biol.* 2019 Dec; 15(12):e1007118. doi: [10.1101/652727](https://doi.org/10.1101/652727).
- 927 **Pinheiro J**, Bates D, DebRoy S, Sarkar D, R Core Team. nlme: Linear and Nonlinear Mixed Effects Models; 2016,  
928 <http://CRAN.R-project.org/package=nlme>, r package version 3.1-128.
- 929 **R Core Team**. R: A Language and Environment for Statistical Computing. R Foundation for Statistical Computing,  
930 Vienna, Austria; 2016, <https://www.R-project.org/>.
- 931 **Redding GM**, Wallace B. Adaptive Coordination and Alignment of Eye and Hand. *J Mot Behav.* 1993 Jun;  
932 25(2):75–88. doi: [10.1080/00222895.1993.9941642](https://doi.org/10.1080/00222895.1993.9941642).
- 933 **Roddey JC**, Girish B, Miller JP. Assessing the Performance of Neural Encoding Models in the Presence of Noise. *J*  
934 *Comput Neurosci.* 2000; 8(2):95–112.
- 935 **Roth E**, Hall RW, Daniel TL, Sponberg S. Integration of Parallel Mechanosensory and Visual Pathways  
936 Resolved through Sensory Conflict. *Proc Natl Acad Sci USA.* 2016 Nov; 113(45):12832–12837. doi:  
937 [10.1073/pnas.1522419113](https://doi.org/10.1073/pnas.1522419113).
- 938 **Roth E**, Sponberg S, Cowan NJ. A Comparative Approach to Closed-Loop Computation. *Current Opinion in*  
939 *Neurobiology.* 2014; 25:54–62. <http://dx.doi.org/10.1016/j.conb.2013.11.005>, doi: [10.1016/j.conb.2013.11.005](https://doi.org/10.1016/j.conb.2013.11.005).
- 940 **Roth E**, Zhuang K, Stamper SA, Fortune ES, Cowan NJ. Stimulus Predictability Mediates a Switch in Locomotor  
941 Smooth Pursuit Performance for *Eigenmannia virescens*. *J Exp Biol.* 2011 Apr; 214(Pt 7):1170–1180. doi:  
942 [10.1242/jeb.048124](https://doi.org/10.1242/jeb.048124).
- 943 **de Rugy A**, Loeb GE, Carroll TJ. Muscle coordination is habitual rather than optimal. *J Neurosci.* 2012 May;  
944 32(21):7384–91. doi: [10.1523/JNEUROSCI.5792-11.2012](https://doi.org/10.1523/JNEUROSCI.5792-11.2012).
- 945 **Russell DM**, Sternad D. sinusoidal visuomotor tracking: intermittent servo-control or coupled oscillations? *J*  
946 *Mot Behav.* 2001 Dec; 33:329–49.
- 947 **Schoukens J**, Pintelon R, Rolain Y. Time Domain Identification, Frequency Domain Identification. Equivalen-  
948 cies! Differences? In: *Proceedings of the 2004 American Control Conference*, vol. 1; 2004. p. 661–666. doi:  
949 [10.23919/ACC.2004.1383679](https://doi.org/10.23919/ACC.2004.1383679).
- 950 **Schugens MM**, Breitenstein C, Ackermann H, Daum I. Role of the Striatum and the Cerebellum in Motor Skill  
951 Acquisition. *Behav Neurol.* 1998; 11(3):149–157.
- 952 **Schultz W**, Dayan P, Montague PR. A Neural Substrate of Prediction and Reward. *Science.* 1997 Mar;  
953 275(5306):1593–1599. doi: [10.1126/science.275.5306.1593](https://doi.org/10.1126/science.275.5306.1593).
- 954 **Schween R**, McDougale SD, Hegele M, Taylor JA. Explicit strategies in force field adaptation. *bioRxiv.* 2019 Jul; doi:  
955 [10.1101/694430](https://doi.org/10.1101/694430).
- 956 **Shadmehr R**, Mussa-Ivaldi FA. Adaptive Representation of Dynamics during Learning of a Motor Task. *J Neurosci.*  
957 1994 May; 14(5 Pt 2):3208–3224.
- 958 **Shadmehr R**, Smith MA, Krakauer JW. Error Correction, Sensory Prediction, and Adaptation in Motor Control.  
959 *Annu Rev Neurosci.* 2010; 33:89–108. doi: [10.1146/annurev-neuro-060909-153135](https://doi.org/10.1146/annurev-neuro-060909-153135).
- 960 **Smart WD**, Kaelbling LP. Practical Reinforcement Learning in Continuous Spaces. In: *Proceedings of the*  
961 *Seventeenth International Conference on Machine Learning ICML '00*, San Francisco, CA, USA: Morgan Kaufmann  
962 Publishers Inc.; 2000. p. 903–910.
- 963 **Sponberg S**, Dyhr JP, Hall RW, Daniel TL. Luminance-Dependent Visual Processing Enables Moth Flight in Low  
964 Light. *Science.* 2015 Jun; 348(6240):1245–1248. doi: [10.1126/science.aaa3042](https://doi.org/10.1126/science.aaa3042).
- 965 **Sternad D**. It's Not (Only) the Mean That Matters: Variability, Noise and Exploration in Skill Learning. *Curr Opin*  
966 *Behav Sci.* 2018 Apr; 20:183–195. doi: [10.1016/j.cobeha.2018.01.004](https://doi.org/10.1016/j.cobeha.2018.01.004).
- 967 **Stoica P**, Moses RL. Spectral analysis of signals. Upper Saddle River, NJ.: Pearson/Prentice Hall; 2005.



- 968 **Taylor JA**, Ivry RB. Flexible Cognitive Strategies during Motor Learning. *PLoS Comput Biol.* 2011 Mar; 7(3). doi:  
969 [10.1371/journal.pcbi.1001096](https://doi.org/10.1371/journal.pcbi.1001096).
- 970 **Taylor JA**, Klemfuss NM, Ivry RB. An Explicit Strategy Prevails When the Cerebellum Fails to Compute Movement  
971 Errors. *Cerebellum.* 2010 Dec; 9(4):580–586. doi: 10.1007/s12311-010-0201-x.
- 972 **Taylor JA**, Krakauer JW, Ivry RB. Explicit and implicit contributions to learning in a sensorimotor adaptation task.  
973 *J Neurosci.* 2014 Feb; 34(8):3023–3032. doi: [10.1523/JNEUROSCI.3619-13.2014](https://doi.org/10.1523/JNEUROSCI.3619-13.2014).
- 974 **Tcheang L**, Bühlhoff HH, Burgess N. Visual influence on path integration in darkness indicates a multimodal  
975 representation of large-scale space. *Proceedings of the National Academy of Sciences.* 2011; 108(3):1152–  
976 1157.
- 977 **Telgen S**, Parvin D, Diedrichsen J. Mirror Reversal and Visual Rotation Are Learned and Consolidated via  
978 Separate Mechanisms: Recalibrating or Learning de Novo? *J Neurosci.* 2014 Oct; 34(41):13768–13779. doi:  
979 [10.1523/JNEUROSCI.5306-13.2014](https://doi.org/10.1523/JNEUROSCI.5306-13.2014).
- 980 **Theodorou E**, Buchli J, Schaal S. Reinforcement Learning of Motor Skills in High Dimensions: A Path Integral  
981 Approach. In: *2010 IEEE International Conference on Robotics and Automation*; 2010. p. 2397–2403. doi:  
982 [10.1109/ROBOT.2010.5509336](https://doi.org/10.1109/ROBOT.2010.5509336).
- 983 **Todorov E**. Efficient Computation of Optimal Actions. *Proc Natl Acad Sci USA.* 2009 Jul; 106(28):11478–11483.  
984 doi: [10.1073/pnas.0710743106](https://doi.org/10.1073/pnas.0710743106).
- 985 **Tseng YW**, Diedrichsen J, Krakauer JW, Shadmehr R, Bastian AJ. Sensory Prediction Errors Drive Cerebellum-  
986 Dependent Adaptation of Reaching. *J Neurophysiol.* 2007 Jul; 98(1):54–62. doi: [10.1152/jn.00266.2007](https://doi.org/10.1152/jn.00266.2007).
- 987 **Umeyama S**. Least-squares estimation of transformation parameters between two point patterns. *IEEE*  
988 *Transactions on Pattern Analysis and Machine Intelligence.* 1991; 13(4):376–380.
- 989 **van Vugt FT**, Ostry DJ. The Structure and Acquisition of Sensorimotor Maps. *J Cogn Neurosci.* 2018 Mar;  
990 30(3):290–306. doi: [10.1162/jocn\\_a\\_01204](https://doi.org/10.1162/jocn_a_01204).
- 991 **Wang JX**, Kurth-Nelson Z, Kumaran D, Tirumala D, Soyer H, Leibo JZ, Hassabis D, Botvinick M. Prefrontal Cortex  
992 as a Meta-Reinforcement Learning System. *Nat Neurosci.* 2018 Jun; 21(6):860–868. doi: [10.1038/s41593-018-](https://doi.org/10.1038/s41593-018-0147-8)  
993 [0147-8](https://doi.org/10.1038/s41593-018-0147-8).
- 994 **Werner S**, Bock O. Mechanisms for visuomotor adaptation to left–right reversed vision. *Hum Mov Sci.* 2010 Apr;  
995 29(2):172–178. doi: [10.1016/j.humov.2010.02.004](https://doi.org/10.1016/j.humov.2010.02.004).
- 996 **Wilterson SA**, Taylor JA. Implicit Visuomotor Adaptation Remains Limited after Several Days of Training. *bioRxiv.*  
997 2019 Aug; doi: [10.1101/711598](https://doi.org/10.1101/711598).
- 998 **Yamagami M**, Howell D, Roth E, Burden S. Contributions of feedforward and feedback control in a manual  
999 trajectory-tracking task. *IFAC-PapersOnLine.* 2019 Jan; 51:61–66. doi: [10.1016/j.ifacol.2019.01.025](https://doi.org/10.1016/j.ifacol.2019.01.025).
- 1000 **Zimmet AM**, Bastian AJ, Cowan NJ. Cerebellar Patients Have Intact Feedback Control That Can Be Leveraged to  
1001 Improve Reaching. *bioRxiv.* 2019 Nov; doi: [10.1101/827113](https://doi.org/10.1101/827113).

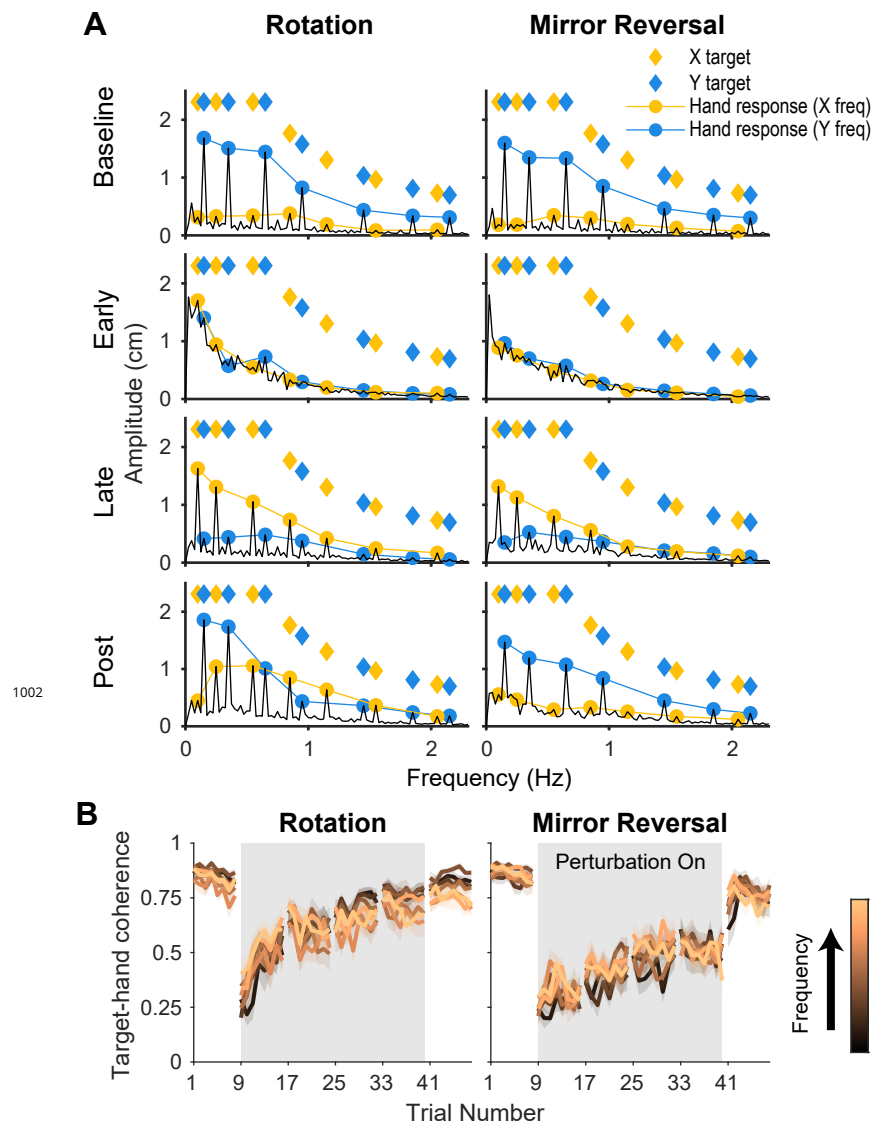

**Figure 4-Figure supplement 1.** Amplitude spectra and coherence plots for *y*-hand movements. **A.** Amplitude spectra of *y*-hand movements (black) averaged across participants from one trial in each listed block. The amplitudes and frequencies of target movement are indicated by diamonds (yellow: *x*-target; blue: *y*-target). Hand responses at the *x*- (yellow circles) and *y*-target (blue circles) frequencies are connected by lines, respectively, for ease of visualization. **B.** Spectral coherence between *y*-target movement and both *x*- and *y*-hand movement. Darker colors represent lower frequencies and lighter colors represent higher frequencies. Error bars are SEM across participants.

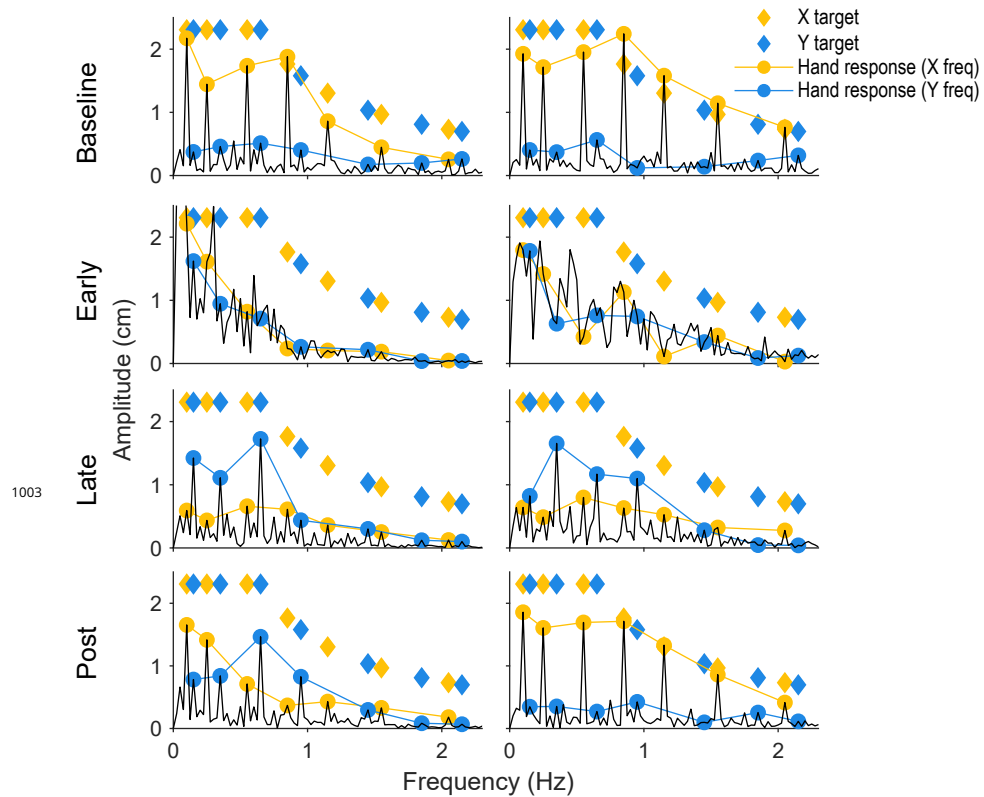

**Figure 4-Figure supplement 2.** Amplitude spectra of  $x$ -hand movements from single subjects. **A.** Amplitude spectra (black) averaged across participants from one trial in each listed block. The amplitudes and frequencies of target movement are indicated by diamonds (yellow:  $x$ -target; blue:  $y$ -target). Hand responses at the  $x$ - (yellow circles) and  $y$ -target (blue circles) frequencies are connected by lines, respectively, for ease of visualization.

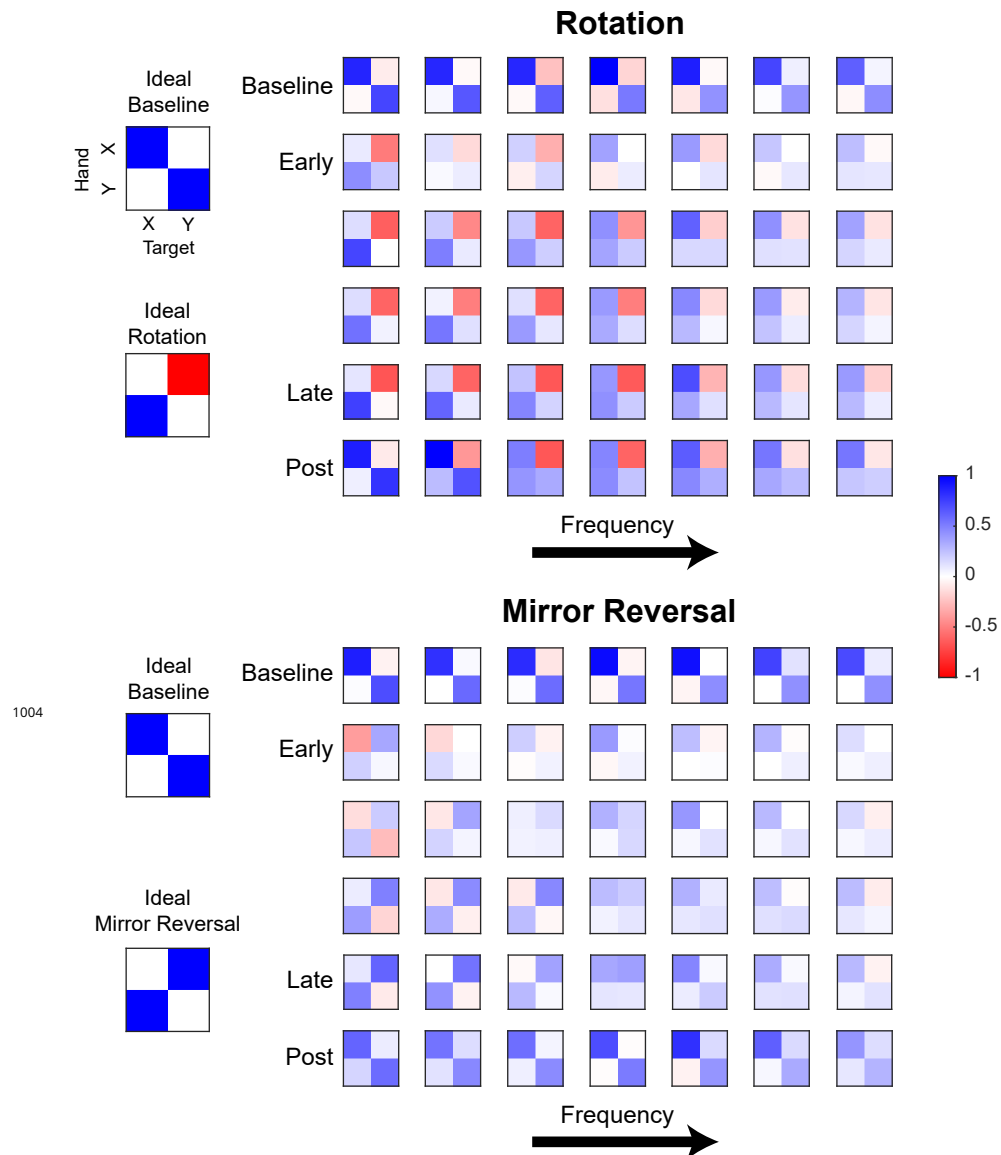

**Figure 5-Figure supplement 1.** Gain matrices fitted for different frequencies of hand movement. Each element within a  $2 \times 2$  matrix is the gain estimated between hand and target movement at a particular frequency. Each row of matrices displays the data from one trial of a tracking block (averaged across participants) and each column is a frequency (frequencies increase from left to right). Although only one trial of each block is depicted, other trials within each block were qualitatively similar. **Figure 5A** was created by plotting the left column vector of each matrix as a green arrow and the right column vector as a purple arrow.

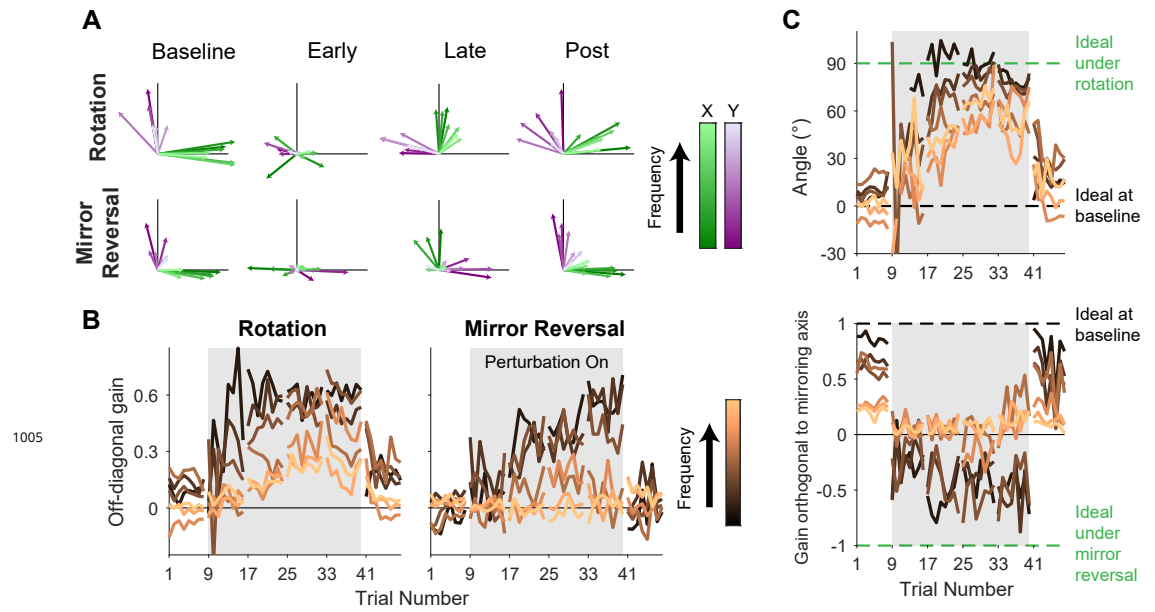

**Figure 5-Figure supplement 2.** Gain matrix analysis, identical to the one performed in *Figure 5* except performed on a single subject from each group. **A.** Visualizations of gain matrices from a single trial in each listed block. **B.** Average of the off-diagonal values of the gain matrix. **C.** Compensation angle for the rotation group and gain orthogonal to the mirroring axis for the mirror-reversal group. Note compensation angles could not be estimated for every trial using our singular value decomposition approach, so several data points are missing in the figure (see "Trajectory-alignment analysis" for details on this approach).

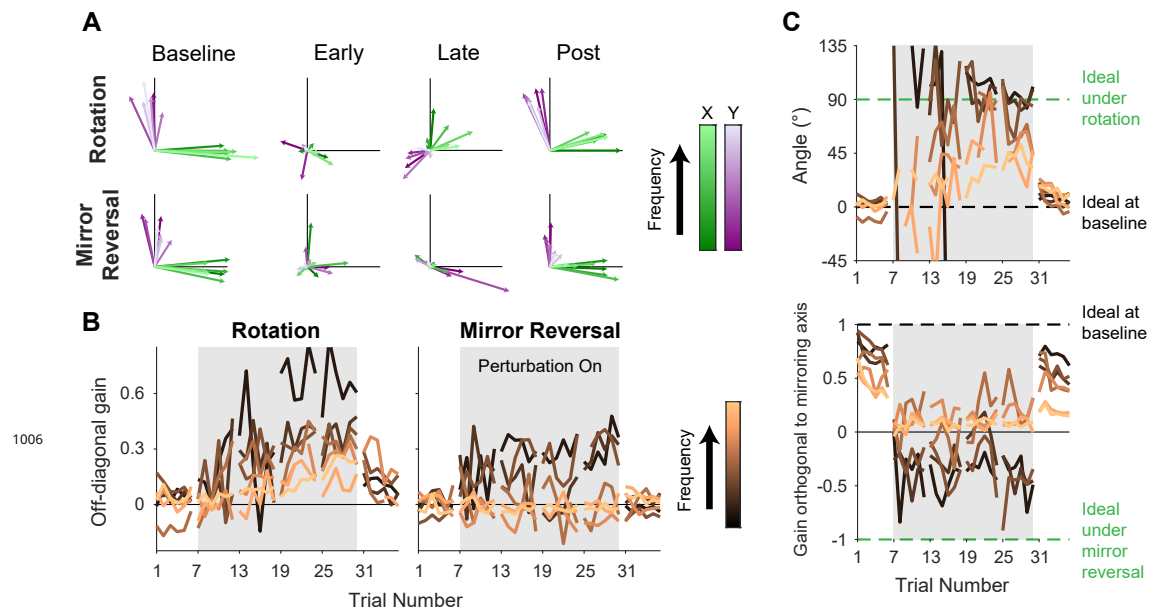

**Figure 6-Figure supplement 1.** Gain matrix analysis, identical to the one performed in *Figure 6* except performed on a single subject from each group. **A.** Visualizations of gain matrices from a single trial in each listed block. **B.** Average of the off-diagonal values of the gain matrix. **C.** Compensation angle for the rotation group and gain orthogonal to the mirror axis for the mirror-reversal group. Note compensation angles could not be estimated for every trial using our singular value decomposition approach (see "Trajectory-alignment analysis" for details on this approach), so several data points are missing in the figure.
